# Supplementary material for: A Comprehensive Analysis of the T and B Lymphocytes Repertoire Shaped by HIV Vaccines
Source: Front Immunol. 2018 Sep 26;9:2194. doi: 10.3389/fimmu.2018.02194 (PMC6168627; doi:10.3389/fimmu.2018.02194)
Supplement: Supplementary file 1 [file Table_1.XLSX]

## Sheet: Sheet1
Supplementary Table 1: Individual information
Group	Macaque	Weight (Kg)	Gender	Year of Birth
N36	07D122	4	Male	2007
	A2L097	14.1	Male	2002
	04D193	5.55	Female	2004
	05D002	9.25	Male	2005
	A6L108	6.2	Male	2006
	A5R043	8.95	Male	2005
	average weight/group	8.01
N51	07D098	4.3	Male	2007
	A2L019	13.45	Male	2007
	07D075	5.6	Male	2007
	A5R069	9.25	Male	2005
	04D323	6.3	Female	2004
	05D131	8.85	Male	2005
	average weight/group	7.96
5-Helix	07D096	4.65	Male	2007
	02D283	12.42	Male	2002
	07D047	5.65	Male	2007
	01D355	9.51	Male	2001
	07D041	6.4	Male	2007
	01D303	7.8	Female	2001
	average weight/group	7.74
