# Supplementary material for: A Comprehensive Analysis of the T and B Lymphocytes Repertoire Shaped by HIV Vaccines
Source: Front Immunol. 2018 Sep 26;9:2194. doi: 10.3389/fimmu.2018.02194 (PMC6168627; doi:10.3389/fimmu.2018.02194)
Supplement: Supplementary file 2 [file Table_2.XLSX]

## Sheet: Sheet1
Supplementary Table 2: Gene specific primers sequences
Name	Seqence(5’-3’)
Reverse transcription
TRBC	TTTTGGGTGTGGGAGATC
IgA	GACCACGTTATCTGACTG
IgM	GGCATTCTCACAGGAGAC
IgE	CAGGGGATCAAGGGGAA
IgG	TGCTCTSGGAGGTGCTC
IgD	GCACGCTGATGTGATGG
Target region PCR
TRBCbio	ACACTTAATTAACTGGGAACACYTTTTTCAGGT
IGHGbio	ACACTTAATTAACCTSGGAGGTGCTCCTGGA
IGHDbio	ACACTTAATTAACGCACGCTGATATGATGGGG
IGHAbio	ACACTTAATTAACAGACCTTGGGKYTGGTCGG
IGHMbio	ACACTTAATTAACGTTGGGGCGGATGCACTC
IGHEbio	ACACTTAATTAACACGAAGGGGCTCTGTATG
The protective nucleotides are in red. The PacI restriction enzyme recognized nucleotides are in orange. Gene-specific nucleotides are in black.
