# Supplementary material for: A Comprehensive Analysis of the T and B Lymphocytes Repertoire Shaped by HIV Vaccines
Source: Front Immunol. 2018 Sep 26;9:2194. doi: 10.3389/fimmu.2018.02194 (PMC6168627; doi:10.3389/fimmu.2018.02194)
Supplement: Supplementary file 5 [file Table_5.XLSX]

## Sheet: expanded_TRB_review
group	monkey	cdr3	flag	D0_freq	D07_freq	D10_freq	ratio_D7/D0	ratio_D10/D0	ratio_D7_D10
5-Helix	01D303	CASSHSQEGNTAQLFF	emerged	-	0.0187509	0.0156257	-	-	1.2
5-Helix	01D303	CASSPGTAYNEQFF	expanded	0.00312515	0.0171883	0.0125006	5.5	4	1.375
5-Helix	01D303	CSVVGSETGETQYF	expanded	0.0140632	0.282826	0.167195	20.1111	11.8889	1.69159
5-Helix	01D303	CASSPEWSQGAYEQYF	expanded	0.0281263	0.084379	0.0562526	3	2	1.5
5-Helix	01D303	CASSLAGTARGSPLYF	expanded	0.00937544	0.0296889	0.0312515	3.16667	3.33333	0.95
5-Helix	01D303	CASSFEVDYTF	expanded	0.0250012	0.0578152	0.0406269	2.3125	1.625	1.42308
5-Helix	01D303	CASSTRTFPYEQYF	expanded	0.00156257	0.0265637	0.0281263	17	18	0.944444
5-Helix	01D303	CASSDWFASVLTF	expanded	0.0296889	0.0656281	0.0453146	2.21053	1.52632	1.44828
5-Helix	01D303	CASSYSGGEQYF	expanded	0.00156257	0.0203135	0.0125006	13	8	1.625
5-Helix	01D303	CASGPKHRVHQPQYF	expanded	0.0437521	0.125006	0.132819	2.85714	3.03571	0.941176
5-Helix	01D303	CASSRQGVGDYTF	expanded	0.0312515	0.0937544	0.0703158	3	2.25	1.33333
5-Helix	01D303	CASSLGTGPDEQYF	emerged	-	0.0343766	0.0265637	-	-	1.29412
5-Helix	01D303	CASSLGGDQPQYF	emerged	-	0.0359392	0.0125006	-	-	2.875
5-Helix	01D303	CASSGNLNEKLFF	expanded	0.0171883	0.0390643	0.0406269	2.27273	2.36364	0.961538
5-Helix	01D303	CSVDKGDSYGEQFF	expanded	0.00781287	0.0265637	0.0156257	3.4	2	1.7
5-Helix	01D303	CASSYGWGNYGEQFF	expanded	0.00625029	0.0140632	0.010938	2.25	1.75	1.28571
5-Helix	01D303	CASSLSGGTNEKLFF	expanded	0.0156257	0.0812538	0.0812538	5.2	5.2	1
5-Helix	01D303	CASSEEGGTEAFF	emerged	-	0.0343766	0.0140632	-	-	2.44444
5-Helix	01D303	CASSQDSETQYF	expanded	0.00625029	0.0390643	0.0250012	6.25	4	1.5625
5-Helix	01D303	CASSGTGATYEQYF	expanded	0.0875041	0.190634	0.15782	2.17857	1.80357	1.20792
5-Helix	01D303	CASEDWGELRETQYF	emerged	-	0.0156257	0.010938	-	-	1.42857
5-Helix	01D303	CASSETGGSYGEQFF	expanded	0.00781287	0.0156257	0.0140632	2	1.8	1.11111
5-Helix	01D355	CASSLNGQGNTVYF	emerged	-	0.0140632	0.0234386	-	-	0.6
5-Helix	01D355	CATSDLQLTGSNQPQYF	emerged	-	0.010938	0.0125006	-	-	0.875
5-Helix	01D355	CASSHGNQPQYF	emerged	-	0.0250012	0.010938	-	-	2.28571
5-Helix	01D355	CATGAGIGQLFF	expanded	0.0234386	0.0515649	0.0437521	2.2	1.86667	1.17857
5-Helix	01D355	CATSDTHRGGEDEQFF	expanded	0.00625029	0.0140632	0.0125006	2.25	2	1.125
5-Helix	01D355	CASSQYSGSSNQPQYF	expanded	0.375018	0.831289	1.02192	2.21667	2.725	0.813456
5-Helix	01D355	CASSPTRGQDNYEQYF	expanded	0.00156257	0.010938	0.0125006	7	8	0.875
5-Helix	01D355	CASTKSHGPVMNTEAFF	expanded	0.0203135	0.0671906	0.0687532	3.30769	3.38462	0.977273
5-Helix	01D355	CASSGGDEATF	expanded	0.00468772	0.0375018	0.0171883	8	3.66667	2.18182
5-Helix	01D355	CASSELGGAPETQYF	expanded	0.195322	0.409394	0.342204	2.096	1.752	1.19635
5-Helix	01D355	CASTQNQPQYF	expanded	0.340641	0.74066	0.915668	2.17431	2.68807	0.808874
5-Helix	01D355	CAGSQPDSFNQPQYF	expanded	0.00937544	0.0187509	0.0390643	2	4.16667	0.48
5-Helix	01D355	CASSQPDSFNQPQHF	expanded	0.00625029	0.0171883	0.010938	2.75	1.75	1.57143
5-Helix	01D355	CASSETPGQGSGASVLTF	expanded	0.298451	0.676594	0.782849	2.26702	2.62304	0.864271
5-Helix	01D355	CASSLLKGNQPQYF	expanded	0.0140632	0.0312515	0.021876	2.22222	1.55556	1.42857
5-Helix	01D355	CSARDGGNYNEQFF	emerged	-	0.010938	0.0187509	-	-	0.583333
5-Helix	01D355	CSASAGGNYNEQFF	expanded	0.706283	2.44386	2.19229	3.46018	3.10398	1.11475
5-Helix	01D355	CASSEDSGGAYEQYF	expanded	0.00312515	0.010938	0.0125006	3.5	4	0.875
5-Helix	01D355	CASSKLQGLEDDYTF	expanded	0.00781287	0.0171883	0.0140632	2.2	1.8	1.22222
5-Helix	01D355	CASKGYEQYF	expanded	0.160945	0.339078	0.326578	2.1068	2.02913	1.03828
5-Helix	01D355	CASSSWGGRGNTQYF	expanded	0.00312515	0.021876	0.0125006	7	4	1.75
5-Helix	01D355	CASSEDWTGNSPLYF	expanded	0.0171883	0.0375018	0.0437521	2.18182	2.54545	0.857143
5-Helix	01D355	CASSYPWDTF	emerged	-	0.167195	0.0593778	-	-	2.81579
5-Helix	01D355	CASSQPGQWETQYF	expanded	0.175008	0.428145	0.484398	2.44643	2.76786	0.883871
5-Helix	01D355	CASSQDRGTDDYTF	expanded	0.00156257	0.0156257	0.010938	10	7	1.42857
5-Helix	01D355	CASNQPDSFNQPQYF	expanded	0.00156257	0.010938	0.0125006	7	8	0.875
5-Helix	01D355	CASSQTSGNTVYF	expanded	0.00156257	0.0187509	0.010938	12	7	1.71429
5-Helix	01D355	CASSETIGTVMNTEAFF	expanded	0.00312515	0.0421895	0.0265637	13.5	8.5	1.58824
5-Helix	01D355	CASSQPDSFSQPQYF	expanded	0.00468772	0.0156257	0.0171883	3.33333	3.66667	0.909091
5-Helix	01D355	CASRWTGKSDYTF	expanded	0.409394	0.993797	0.982859	2.42748	2.40076	1.01113
5-Helix	01D355	CASSLGGGAGNQPQYF	expanded	6.2331	14.8976	15.646	2.39007	2.51015	0.952162
5-Helix	01D355	CASSPDWGGEGTQYF	expanded	0.00156257	0.0171883	0.010938	11	7	1.57143
5-Helix	01D355	CASSQARDSPQNTQYF	emerged	-	0.0406269	0.010938	-	-	3.71429
5-Helix	01D355	CASSEGRVNPQYF	expanded	0.17032	0.384393	0.389081	2.25688	2.2844	0.987952
5-Helix	01D355	CASSQGNQPQYF	emerged	-	0.0156257	0.010938	-	-	1.42857
5-Helix	01D355	CSGGRGGAGNEQFF	expanded	0.775036	2.2376	2.08135	2.8871	2.68548	1.07508
5-Helix	01D355	CSARDGGSSENEQFF	expanded	0.414082	1.28756	1.09536	3.10943	2.64528	1.17546
5-Helix	01D355	CSARDGGSSQNTQYF	expanded	0.0234386	0.0500023	0.0578152	2.13333	2.46667	0.864865
5-Helix	02D283	CASQAGTVNTAQLFF	expanded	0.00781287	0.0265637	0.0250012	3.4	3.2	1.0625
5-Helix	02D283	CASSLESGYNDYTF	expanded	0.00781287	0.0171883	0.0203135	2.2	2.6	0.846154
5-Helix	02D283	CASSLGGQDEKLFF	expanded	0.0234386	0.0484398	0.0734409	2.06667	3.13333	0.659574
5-Helix	02D283	CASSEIGVGPDPQYF	expanded	0.00625029	0.0171883	0.010938	2.75	1.75	1.57143
5-Helix	02D283	CASSKVSAVREKLFF	expanded	0.132819	0.318765	0.38283	2.4	2.88235	0.832653
5-Helix	02D283	CASGNGSGREQYF	expanded	0.0250012	0.0531275	0.0578152	2.125	2.3125	0.918919
5-Helix	02D283	CASSWGSNQPQYF	expanded	0.0546901	0.154695	0.276575	2.82857	5.05714	0.559322
5-Helix	02D283	CASSQEGYGQTYEQYF	expanded	2.25792	5.67839	5.84715	2.51488	2.58962	0.971138
5-Helix	02D283	CASNPPERGSNQPQYF	expanded	0.00781287	0.0203135	0.010938	2.6	1.4	1.85714
5-Helix	02D283	CASGSLEGVGNQPQYF	emerged	-	0.0390643	0.0265637	-	-	1.47059
5-Helix	02D283	CASSLATGTGGYLSGNTAYF	expanded	0.00156257	0.0140632	0.021876	9	14	0.642857
5-Helix	02D283	CASSLATGTGGYLSGNTVYF	expanded	2.37667	5.93622	6.60656	2.4977	2.77975	0.898534
5-Helix	02D283	CASSHSGGSTTDPQYF	expanded	0.00625029	0.0234386	0.0187509	3.75	3	1.25
5-Helix	02D283	CASRDHTTTNEKLFF	expanded	0.010938	0.0250012	0.0375018	2.28571	3.42857	0.666667
5-Helix	02D283	CSASEAGVGYEQYF	expanded	0.0187509	0.0515649	0.032814	2.75	1.75	1.57143
5-Helix	02D283	CASSFTAIQNTQYF	expanded	1.03286	2.70481	3.41891	2.61876	3.31014	0.791133
5-Helix	02D283	CASSHGNQPQYF	emerged	-	0.0593778	0.0375018	-	-	1.58333
5-Helix	02D283	CASTKSLDNSPLHF	emerged	-	0.0265637	0.0125006	-	-	2.125
5-Helix	02D283	CASGKNISYNSPLHF	expanded	0.00156257	0.010938	0.010938	7	7	1
5-Helix	02D283	CASSPPTGGRSYEQYF	expanded	0.0531275	0.123443	0.123443	2.32353	2.32353	1
5-Helix	02D283	CASSGGALDGEQFF	expanded	0.0140632	0.0359392	0.0343766	2.55556	2.44444	1.04545
5-Helix	02D283	CASSQEAGGRLSTEAFF	emerged	-	0.0234386	0.010938	-	-	2.14286
5-Helix	02D283	CASSGEGNSPLHF	expanded	1.03599	2.60168	3.63142	2.51131	3.50528	0.716437
5-Helix	02D283	CASSHGALDYDYTF	expanded	0.137506	0.298451	0.332828	2.17045	2.42045	0.896714
5-Helix	02D283	CASSQVGATTDPQYF	expanded	0.0625029	0.126568	0.114068	2.025	1.825	1.10959
5-Helix	02D283	CASNTGTTAQLFF	expanded	0.00312515	0.0187509	0.0140632	6	4.5	1.33333
5-Helix	02D283	CATAIRGGFGEQFF	expanded	0.712533	1.53445	1.76727	2.15351	2.48026	0.868258
5-Helix	02D283	CASSTGAPGYGEQFF	expanded	0.00781287	0.021876	0.0156257	2.8	2	1.4
5-Helix	02D283	CASRRRPIAGDEQYF	emerged	-	0.0296889	0.0140632	-	-	2.11111
5-Helix	02D283	CASSFYEKLFF	expanded	0.00468772	0.0156257	0.0156257	3.33333	3.33333	1
5-Helix	02D283	CASSLGDQPQYF	expanded	0.00156257	0.0593778	0.0296889	38	19	2
5-Helix	02D283	CASSLGDSPLHF	expanded	0.00468772	0.0515649	0.0140632	11	3	3.66667
5-Helix	02D283	CASSEQGSSQNTQYF	emerged	-	0.0125006	0.010938	-	-	1.14286
5-Helix	02D283	CASSRQGASPQNTQYF	expanded	0.010938	0.0234386	0.0140632	2.14286	1.28571	1.66667
5-Helix	02D283	CASSTDPQYF	expanded	0.0234386	0.0484398	0.0750035	2.06667	3.2	0.645833
5-Helix	02D283	CASSLATGTGGYPSGNTVYF	expanded	0.00156257	0.010938	0.0125006	7	8	0.875
5-Helix	02D283	CASSLEGGRETQYF	expanded	0.00312515	0.0781287	0.0437521	25	14	1.78571
5-Helix	02D283	CANQGGNQPQYF	emerged	-	0.0234386	0.010938	-	-	2.14286
5-Helix	02D283	CASSLGTANEKLFF	expanded	1.68914	3.40172	3.6658	2.01388	2.17021	0.927962
5-Helix	02D283	CASRHPTGVTNEKLFF	expanded	0.00468772	0.0156257	0.0187509	3.33333	4	0.833333
5-Helix	02D283	CASSYRPEKYDYTF	emerged	-	0.0187509	0.0406269	-	-	0.461538
5-Helix	02D283	CASSSGPDTEAFF	expanded	0.131256	0.292201	0.307827	2.22619	2.34524	0.949239
5-Helix	02D283	CASSYRPAVSPLHF	expanded	0.00625029	0.0609404	0.135944	9.75	21.75	0.448276
5-Helix	02D283	CATTAEAGGNTAQLFF	emerged	-	0.0140632	0.0156257	-	-	0.9
5-Helix	02D283	CASIRQMNTEAFF	expanded	0.00468772	0.0906292	0.0562526	19.3333	12	1.61111
5-Helix	07D041	CASSLGQELFF	expanded	0.00312515	0.010938	0.0125006	3.5	4	0.875
5-Helix	07D041	CASSLGQNYDYTF	expanded	0.00312515	0.0156257	0.0140632	5	4.5	1.11111
5-Helix	07D041	CASSRDRDNTVYF	emerged	-	0.0140632	0.0203135	-	-	0.692308
5-Helix	07D041	CASSIEGETEAFF	expanded	0.021876	0.0453146	0.0609404	2.07143	2.78571	0.74359
5-Helix	07D041	CASSGDSEETQYF	expanded	0.00156257	0.0125006	0.010938	8	7	1.14286
5-Helix	07D041	CASSKDHRGDEKLFF	emerged	-	0.0203135	0.0187509	-	-	1.08333
5-Helix	07D041	CASSQDSGSPEAQYF	expanded	0.00312515	0.0140632	0.010938	4.5	3.5	1.28571
5-Helix	07D041	CASSPGSTGDGEAFF	emerged	-	0.032814	0.0203135	-	-	1.61538
5-Helix	07D041	CASSLGGRVDDYTF	expanded	0.00312515	0.021876	0.0234386	7	7.5	0.933333
5-Helix	07D041	CASSPEGTGFDYTF	expanded	0.0156257	0.0359392	0.0187509	2.3	1.2	1.91667
5-Helix	07D041	CASSLWGLGSNEQFF	emerged	-	0.0390643	0.0171883	-	-	2.27273
5-Helix	07D041	CASSEGTRGSYDYTF	emerged	-	0.0359392	0.0250012	-	-	1.4375
5-Helix	07D041	CASSSSGLSYNEQFF	expanded	0.0140632	0.0421895	0.0156257	3	1.11111	2.7
5-Helix	07D041	CASSFGVVDSPLHF	expanded	0.00156257	0.0625029	0.0578152	40	37	1.08108
5-Helix	07D041	CASSDGGRNQPQYF	expanded	0.00937544	0.0187509	0.0234386	2	2.5	0.8
5-Helix	07D041	CASSLSRVYYDYTF	emerged	-	0.0140632	0.0171883	-	-	0.818182
5-Helix	07D041	CASSLGAGGRDPQYF	emerged	-	0.0265637	0.0265637	-	-	1
5-Helix	07D041	CASRGYNEQFF	expanded	0.00312515	0.0171883	0.0125006	5.5	4	1.375
5-Helix	07D041	CSVEDKTARNYDYTF	expanded	0.00156257	0.0343766	0.0125006	22	8	2.75
5-Helix	07D041	CASSSDWGGYEQYF	expanded	0.0171883	0.0359392	0.0265637	2.09091	1.54545	1.35294
5-Helix	07D041	CASSLGGWVDDYTL	expanded	0.00625029	0.0234386	0.0187509	3.75	3	1.25
5-Helix	07D041	CASSQWHSQNTQYF	expanded	0.00781287	0.0171883	0.0125006	2.2	1.6	1.375
5-Helix	07D041	CASATRDEQYF	expanded	0.00156257	0.0703158	0.032814	45	21	2.14286
5-Helix	07D041	CSAERMGEFQETQYF	expanded	0.010938	0.0250012	0.0171883	2.28571	1.57143	1.45455
5-Helix	07D041	CASWGQGVHEQFF	emerged	-	0.032814	0.010938	-	-	3
5-Helix	07D041	CASSENYAGNNQPQYF	expanded	0.00468772	0.0140632	0.0125006	3	2.66667	1.125
5-Helix	07D041	CASRIGLRVSYTF	emerged	-	0.010938	0.0140632	-	-	0.777778
5-Helix	07D041	CASSLGGWVDDCTF	emerged	-	0.010938	0.0156257	-	-	0.7
5-Helix	07D041	CASSRTLDQPQYF	expanded	0.00937544	0.021876	0.0140632	2.33333	1.5	1.55556
5-Helix	07D041	CASSQRDTDSYEQYF	expanded	0.0484398	0.114068	0.0546901	2.35484	1.12903	2.08571
5-Helix	07D041	CASSLQGLSNSPLYF	emerged	-	0.0343766	0.0156257	-	-	2.2
5-Helix	07D041	CASRQRQGTSYNEQFF	expanded	0.0234386	0.0468772	0.0453146	2	1.93333	1.03448
5-Helix	07D041	CASSLGQDNSPLYF	emerged	-	0.0281263	0.0125006	-	-	2.25
5-Helix	07D041	CASSPSRDWGRTDPQYF	emerged	-	0.0203135	0.0125006	-	-	1.625
5-Helix	07D047	CASSADRRYDYTF	expanded	0.00312515	0.0140632	0.0421895	4.5	13.5	0.333333
5-Helix	07D047	CASRGGYQETQYF	expanded	0.0125006	0.0343766	0.134381	2.75	10.75	0.255814
5-Helix	07D047	CASSPRGGEETQYF	expanded	0.00312515	0.0171883	0.0437521	5.5	14	0.392857
5-Helix	07D047	CASSPTGTYNEQFF	expanded	0.0171883	0.0484398	0.0531275	2.81818	3.09091	0.911765
5-Helix	07D047	CSAAQGGEKLFF	expanded	0.00937544	0.0187509	0.0234386	2	2.5	0.8
5-Helix	07D047	CASSIRDRQETQYF	expanded	2.82826	6.78313	16.8805	2.39834	5.96851	0.401833
5-Helix	07D047	CASSQDLVATQYF	expanded	0.00156257	0.0125006	0.0156257	8	10	0.8
5-Helix	07D047	CASSGDRRYDYTF	expanded	0.0234386	0.0484398	0.132819	2.06667	5.66667	0.364706
5-Helix	07D047	CASSQSAFEQFF	emerged	-	0.0468772	0.0125006	-	-	3.75
5-Helix	07D047	CASSFEIGTEAFF	expanded	0.00468772	0.0156257	0.0187509	3.33333	4	0.833333
5-Helix	07D047	CASSFQAGYDYTF	expanded	0.0125006	0.0375018	0.0890667	3	7.125	0.421053
5-Helix	07D047	CASSIRDRQEAQYF	expanded	0.00312515	0.0171883	0.0406269	5.5	13	0.423077
5-Helix	07D047	CASSFREDANYDYTF	expanded	0.00468772	0.0156257	0.0265637	3.33333	5.66667	0.588235
5-Helix	07D047	CASSLNRDRGAFYGEQFF	expanded	0.0546901	0.137506	0.27345	2.51429	5	0.502857
5-Helix	07D047	CASMTFGANYDYTF	emerged	-	0.0156257	0.0203135	-	-	0.769231
5-Helix	07D047	CASSLGLGSNEQFF	expanded	0.00625029	0.021876	0.0156257	3.5	2.5	1.4
5-Helix	07D047	CASSQLARENTQYF	expanded	0.0187509	0.0515649	0.084379	2.75	4.5	0.611111
5-Helix	07D047	CSVEVWGADPQYF	expanded	0.389081	0.96567	0.984421	2.48193	2.53012	0.980952
5-Helix	07D047	CASSGTWNSPLHF	expanded	0.00625029	0.0156257	0.0296889	2.5	4.75	0.526316
5-Helix	07D047	CASSQDRAYEQYF	expanded	0.0671906	0.160945	0.318765	2.39535	4.74419	0.504902
5-Helix	07D047	CASSQLGQTSGASVLTF	expanded	0.00156257	0.0171883	0.0140632	11	9	1.22222
5-Helix	07D047	CASSYIGISGNTVYF	emerged	-	0.0140632	0.010938	-	-	1.28571
5-Helix	07D047	CASSHYRGAHEKLFF	expanded	0.00781287	0.0187509	0.0203135	2.4	2.6	0.923077
5-Helix	07D047	CASSGPGIHYDYTF	expanded	0.021876	0.0437521	0.0468772	2	2.14286	0.933333
5-Helix	07D047	CASSPGTMRTEAFF	expanded	0.214073	0.673469	1.15318	3.14599	5.38686	0.584011
5-Helix	07D047	CASRRWGNTDPQYF	expanded	0.010938	0.0250012	0.0203135	2.28571	1.85714	1.23077
5-Helix	07D047	CASSEWSNQPQYF	expanded	0.00312515	0.0578152	0.010938	18.5	3.5	5.28571
5-Helix	07D047	CASSGENEQFF	expanded	0.0125006	0.0468772	0.0156257	3.75	1.25	3
5-Helix	07D047	CASSQEQTSNQPQYF	emerged	-	0.0171883	0.0140632	-	-	1.22222
5-Helix	07D047	CSATDWGSSYEQYF	expanded	0.0781287	0.167195	0.165633	2.14	2.12	1.00943
5-Helix	07D047	CSAGEVGGAYYEQYF	expanded	0.00781287	0.0265637	0.0265637	3.4	3.4	1
5-Helix	07D047	CASKIDGGTEAFF	expanded	0.125006	0.292201	0.454709	2.3375	3.6375	0.642612
5-Helix	07D047	CASSLTGSGASVLTF	expanded	0.279701	0.570339	1.0438	2.03911	3.73184	0.546407
5-Helix	07D047	CASSLGHDTQYF	expanded	0.021876	0.0453146	0.0406269	2.07143	1.85714	1.11538
5-Helix	07D047	CASSRTGTYNEQFF	expanded	0.00937544	0.0187509	0.032814	2	3.5	0.571429
5-Helix	07D047	CASSQTGTRQETQYF	expanded	0.535963	1.30319	1.02192	2.43149	1.90671	1.27523
5-Helix	07D047	CASSPPLIANTAQLFF	expanded	0.0125006	0.0375018	0.0234386	3	1.875	1.6
5-Helix	07D047	CASSRTGTRQETQYF	expanded	0.132819	0.310952	0.348454	2.34118	2.62353	0.892377
5-Helix	07D047	CASSEARENTQYF	expanded	0.00312515	0.0125006	0.010938	4	3.5	1.14286
5-Helix	07D047	CASIVGTGGDYTF	expanded	0.00625029	0.0531275	0.0578152	8.5	9.25	0.918919
5-Helix	07D047	CASSRGIRGTGLFYEQYF	expanded	0.0265637	0.0593778	0.0593778	2.23529	2.23529	1
5-Helix	07D047	CASSPTEGIAQLFF	expanded	0.0187509	0.0421895	0.0234386	2.25	1.25	1.8
5-Helix	07D047	CASRKDRLSYEQYF	expanded	0.00156257	0.0140632	0.0171883	9	11	0.818182
5-Helix	07D047	CASSHGGGGEQFF	expanded	0.168758	0.368767	0.696908	2.18519	4.12963	0.529148
5-Helix	07D047	CASSLGWVSTDPQYF	expanded	0.00937544	0.0500023	0.0531275	5.33333	5.66667	0.941176
5-Helix	07D047	CASSTRGGNEKLFF	expanded	0.00781287	0.0234386	0.0484398	3	6.2	0.483871
5-Helix	07D047	CASSYSVTGNTEAFF	expanded	0.00781287	0.0250012	0.0281263	3.2	3.6	0.888889
5-Helix	07D047	CASSFPRSYDYTF	emerged	-	0.0437521	0.0171883	-	-	2.54545
5-Helix	07D047	CASSQDRAYEQFF	expanded	0.448459	0.921918	1.44538	2.05575	3.223	0.637838
5-Helix	07D047	CASSSGVGDYTF	expanded	0.0187509	0.0421895	0.0500023	2.25	2.66667	0.84375
5-Helix	07D047	CASSQEQALTSEQYF	emerged	-	0.0265637	0.0171883	-	-	1.54545
5-Helix	07D047	CASQGPNYEQYF	expanded	0.00312515	0.0140632	0.0125006	4.5	4	1.125
5-Helix	07D047	CASSEASGQGSEKLFF	expanded	0.0375018	0.118756	0.154695	3.16667	4.125	0.767677
5-Helix	07D047	CASSQDPTGPTEAFF	emerged	-	0.0125006	0.0140632	-	-	0.888889
5-Helix	07D047	CASSRTGSYNEQFF	expanded	0.00625029	0.0359392	0.0546901	5.75	8.75	0.657143
5-Helix	07D047	CASGDRGNSPLYF	expanded	0.00156257	0.0171883	0.0171883	11	11	1
5-Helix	07D047	CASQGLNYEQYF	expanded	2.08916	5.97841	11.8849	2.86163	5.68886	0.503024
5-Helix	07D047	CASSDQQLGGARYPQYF	expanded	0.27345	0.584402	1.04849	2.13714	3.83429	0.557377
5-Helix	07D096	CASETGVEQYF	expanded	0.00937544	0.0234386	0.0359392	2.5	3.83333	0.652174
5-Helix	07D096	CASSYGESAQLFF	expanded	0.00468772	0.0140632	0.0140632	3	3	1
5-Helix	07D096	CASSKGTTRRNYDYTF	expanded	0.0343766	0.101567	0.0671906	2.95455	1.95455	1.51163
5-Helix	07D096	CASRVSQGPYDYTF	emerged	-	0.0171883	0.0140632	-	-	1.22222
5-Helix	07D096	CASSPNTAQLFF	emerged	-	0.0125006	0.010938	-	-	1.14286
5-Helix	07D096	CASSKGNYDYTF	expanded	0.00625029	0.0250012	0.0187509	4	3	1.33333
5-Helix	07D096	CSARTGAYEQYF	expanded	0.00312515	0.0125006	0.021876	4	7	0.571429
5-Helix	07D096	CASSLDRGNYDYTF	expanded	0.00156257	0.032814	0.010938	21	7	3
5-Helix	07D096	CASSLSLESGKLFF	expanded	0.00312515	0.021876	0.0140632	7	4.5	1.55556
5-Helix	07D096	CASSKGVGQDEQYF	emerged	-	0.021876	0.0156257	-	-	1.4
5-Helix	07D096	CASSPPHWSYEQYF	emerged	-	0.021876	0.0187509	-	-	1.16667
5-Helix	07D096	CASSLTAYEQYF	expanded	0.00625029	0.0203135	0.0140632	3.25	2.25	1.44444
5-Helix	07D096	CASSLGGTEAFF	expanded	0.00781287	0.0187509	0.0187509	2.4	2.4	1
5-Helix	07D096	CASSHSLGRTAQLFF	expanded	0.00468772	0.0203135	0.0140632	4.33333	3	1.44444
5-Helix	07D096	CASSMTGDYDYTF	expanded	0.00312515	0.0187509	0.0171883	6	5.5	1.09091
5-Helix	07D096	CASGGRGQPQYF	emerged	-	0.021876	0.021876	-	-	1
5-Helix	07D096	CAIQKGVEGTQYF	emerged	-	0.0406269	0.0156257	-	-	2.6
5-Helix	07D096	CASSLAGDEYGEQFF	expanded	0.00156257	0.0140632	0.010938	9	7	1.28571
5-Helix	07D096	CASSRTAYEQYF	expanded	0.00156257	0.0234386	0.0187509	15	12	1.25
5-Helix	07D096	CSDAGVDNYDYTF	expanded	0.0140632	0.032814	0.0171883	2.33333	1.22222	1.90909
5-Helix	07D096	CASRSTGVRNYDYTF	expanded	0.00312515	0.0265637	0.0125006	8.5	4	2.125
5-Helix	07D096	CASQTGNSNQPQYF	expanded	0.00781287	0.0187509	0.0156257	2.4	2	1.2
5-Helix	07D096	CSVEDGLGEQYF	emerged	-	0.0156257	0.021876	-	-	0.714286
5-Helix	07D096	CASSPAGGAMNTQYF	expanded	0.00156257	0.0421895	0.0390643	27	25	1.08
5-Helix	07D096	CSASPRETGAQETQYF	emerged	-	0.0359392	0.0125006	-	-	2.875
5-Helix	07D096	CASSLENYDYTF	expanded	0.0203135	0.0546901	0.0546901	2.69231	2.69231	1
N36	04D193	CASSHARDRGEKLFF	expanded	0.193759	0.423457	0.487523	2.18548	2.51613	0.86859
N36	04D193	CASSGVATGGSQNTQYF	emerged	-	0.0312515	0.0406269	-	-	0.769231
N36	04D193	CASSPNHPRDEKLFF	emerged	-	0.0484398	0.0125006	-	-	3.875
N36	04D193	CASSLSTTDYNSPLYF	emerged	-	0.0203135	0.0500023	-	-	0.40625
N36	04D193	CANGQGNQPQYF	expanded	0.00156257	0.207822	0.0171883	133	11	12.0909
N36	04D193	CASSQENRGQPQYF	expanded	0.00468772	0.010938	0.0156257	2.33333	3.33333	0.7
N36	04D193	CASSPGRWGESPVGEQFF	expanded	0.0234386	0.0484398	0.0609404	2.06667	2.6	0.794872
N36	04D193	CASSQVVQGNEKLFF	expanded	0.00625029	0.0171883	0.021876	2.75	3.5	0.785714
N36	04D193	CASSEGQAYEKLFF	expanded	0.00468772	0.010938	0.010938	2.33333	2.33333	1
N36	04D193	CASSGGLELDTQYF	expanded	0.0171883	0.0546901	0.0500023	3.18182	2.90909	1.09375
N36	04D193	CASSLAGGLYNEQFF	expanded	0.0250012	0.0515649	0.0453146	2.0625	1.8125	1.13793
N36	04D193	CSARNRDGYYEQYF	expanded	0.0156257	0.032814	0.0390643	2.1	2.5	0.84
N36	04D193	CASSIGGGELSDPQYF	expanded	0.00468772	0.010938	0.010938	2.33333	2.33333	1
N36	04D193	CASSKESSGESNQPQYF	expanded	0.0250012	0.0578152	0.0453146	2.3125	1.8125	1.27586
N36	04D193	CSARIPGRDYTF	emerged	-	0.0281263	0.0156257	-	-	1.8
N36	04D193	CASSLVGLGEPTDPQYF	expanded	0.00312515	0.010938	0.0156257	3.5	5	0.7
N36	04D193	CASSDRERGAEAFF	emerged	-	0.0203135	0.0125006	-	-	1.625
N36	04D193	CASYLIGAFF	expanded	0.010938	0.0671906	0.0578152	6.14286	5.28571	1.16216
N36	04D193	CASSEPPQGDYDYTF	expanded	0.00781287	0.0234386	0.0140632	3	1.8	1.66667
N36	04D193	CASSSGTANNEQFF	expanded	0.00625029	0.0171883	0.0125006	2.75	2	1.375
N36	04D193	CASRGRGSNYDYTF	expanded	0.00781287	0.0390643	0.0125006	5	1.6	3.125
N36	04D193	CASSFGGQGDEKLFF	expanded	0.00937544	0.0359392	0.0421895	3.83333	4.5	0.851852
N36	04D193	CASSYRDPYYSNQPQYF	expanded	0.0265637	0.0875041	0.0812538	3.29412	3.05882	1.07692
N36	04D193	CSAEKRQGAEKLFF	expanded	0.00937544	0.0437521	0.0265637	4.66667	2.83333	1.64706
N36	04D193	CASSSGGDLNEQFF	expanded	0.00468772	0.0125006	0.0125006	2.66667	2.66667	1
N36	04D193	CASSQQKDNSPLYF	expanded	0.00312515	0.0140632	0.0140632	4.5	4.5	1
N36	04D193	CASSFGTGGDYPNEKLFF	expanded	0.0500023	0.106255	0.10938	2.125	2.1875	0.971429
N36	04D193	CSAKYNRGNTEAFF	expanded	0.00156257	0.0406269	0.0421895	26	27	0.962963
N36	04D193	CASSGGQGNQPQYF	expanded	0.010938	0.0250012	0.0187509	2.28571	1.71429	1.33333
N36	04D193	CASNTRTVGNEKLFF	expanded	0.00937544	0.0281263	0.0203135	3	2.16667	1.38462
N36	04D193	CASSYSTGNTEAFF	emerged	-	0.0265637	0.010938	-	-	2.42857
N36	04D193	CASTKGTGGNNSPLHF	emerged	-	0.0265637	0.0171883	-	-	1.54545
N36	04D193	CTSSLFDDEQFF	expanded	0.00156257	0.010938	0.0156257	7	10	0.7
N36	04D193	CASSLMVGADPQYF	expanded	0.00937544	0.0250012	0.0500023	2.66667	5.33333	0.5
N36	04D193	CASSRQGQNTQYF	expanded	0.0125006	0.0296889	0.0265637	2.375	2.125	1.11765
N36	04D193	CSAPGTANTAQLFF	expanded	0.00312515	0.0156257	0.0250012	5	8	0.625
N36	04D193	CASSYQNWGGYLETQYF	expanded	0.010938	0.0234386	0.0265637	2.14286	2.42857	0.882353
N36	04D193	CASSESTQAENSQNTQYF	emerged	-	0.0156257	0.021876	-	-	0.714286
N36	04D193	CASSTSQGEKLFF	emerged	-	0.032814	0.0156257	-	-	2.1
N36	04D193	CASSQGGVANEKLFF	expanded	0.0156257	0.0484398	0.0406269	3.1	2.6	1.19231
N36	04D193	CASVGRAGNSPLHF	emerged	-	0.021876	0.0171883	-	-	1.27273
N36	04D193	CASSSPGGDYTF	emerged	-	0.0140632	0.010938	-	-	1.28571
N36	04D193	CASSLVPGQGTEAFF	emerged	-	0.0171883	0.0187509	-	-	0.916667
N36	04D193	CASSQDLRGGEKLFF	expanded	0.00312515	0.0265637	0.0171883	8.5	5.5	1.54545
N36	04D193	CASSSGEDEKLFF	expanded	0.00156257	0.0156257	0.0156257	10	10	1
N36	04D193	CASSLQGGDGNTVYF	expanded	0.00937544	0.0234386	0.0453146	2.5	4.83333	0.517241
N36	04D193	CASSSRRGRDTQYF	emerged	-	0.0203135	0.0125006	-	-	1.625
N36	04D193	CSAVGTVYDYTF	emerged	-	0.178133	0.0437521	-	-	4.07143
N36	04D193	CASSHLQAQLFF	expanded	0.00625029	0.185946	0.0453146	29.75	7.25	4.10345
N36	04D193	CASSQYLGDYNSPLYF	expanded	0.0718784	0.176571	0.139069	2.45652	1.93478	1.26966
N36	04D193	CASSYKNQPQYF	emerged	-	0.0468772	0.021876	-	-	2.14286
N36	04D193	CASRNSAGGNTVYF	emerged	-	0.010938	0.0187509	-	-	0.583333
N36	04D193	CASDRSSYEQYF	expanded	0.00156257	0.021876	0.0125006	14	8	1.75
N36	04D193	CASTVRVNYDYTF	expanded	0.00937544	0.0203135	0.0156257	2.16667	1.66667	1.3
N36	04D193	CASSPMTGGGETQYF	expanded	0.00312515	0.0265637	0.010938	8.5	3.5	2.42857
N36	04D193	CASSQDLGGGTTAQLFF	expanded	0.00312515	0.0125006	0.0125006	4	4	1
N36	04D193	CASSLGADATGEQFF	expanded	0.00625029	0.0156257	0.010938	2.5	1.75	1.42857
N36	04D193	CASSLGADHNEQFF	emerged	-	0.0156257	0.0125006	-	-	1.25
N36	04D193	CASSLRPDRSNEKLFF	expanded	0.0156257	0.0406269	0.0390643	2.6	2.5	1.04
N36	04D193	CASSQEEGSTAQLFF	expanded	0.0312515	0.0671906	0.0609404	2.15	1.95	1.10256
N36	04D193	CASSHGNQPQYF	expanded	0.00781287	0.0703158	0.0156257	9	2	4.5
N36	04D193	CASSLSWTENEKLFF	emerged	-	0.0125006	0.021876	-	-	0.571429
N36	04D193	CSAKQGSGNTVYF	expanded	0.00468772	0.0187509	0.0156257	4	3.33333	1.2
N36	04D193	CASSSASRDYTF	expanded	0.00625029	0.0156257	0.0156257	2.5	2.5	1
N36	04D193	CASSDQENTEAFF	emerged	-	0.0171883	0.0203135	-	-	0.846154
N36	04D193	CASMSGDRAASSQNTQYF	expanded	0.00781287	0.0343766	0.0296889	4.4	3.8	1.15789
N36	04D193	CASSHRDRYNEQFF	emerged	-	0.0187509	0.0562526	-	-	0.333333
N36	04D193	CASSEQAGGYEQFF	emerged	-	0.0140632	0.010938	-	-	1.28571
N36	04D193	CASSQEWGNSNTAQLFF	expanded	0.00625029	0.0250012	0.0234386	4	3.75	1.06667
N36	04D193	CSVEDGTRDEKLFF	expanded	0.00468772	0.010938	0.0562526	2.33333	12	0.194444
N36	04D193	CASSYKAGDEKLFF	expanded	0.00468772	0.0125006	0.0250012	2.66667	5.33333	0.5
N36	04D193	CASSDIYDYTF	emerged	-	0.0125006	0.021876	-	-	0.571429
N36	05D002	CASRGLEADPQYF	expanded	0.00468772	0.0171883	0.010938	3.66667	2.33333	1.57143
N36	05D002	CASSPETTNTEAFF	expanded	0.0437521	0.251574	0.229698	5.75	5.25	1.09524
N36	05D002	CASPYSGASVLTF	expanded	0.00625029	0.0156257	0.021876	2.5	3.5	0.714286
N36	05D002	CASSSDYTNSPLYF	expanded	0.0281263	0.0593778	0.0625029	2.11111	2.22222	0.95
N36	05D002	CASSQDRSGGAYEQYF	expanded	0.0156257	0.0375018	0.0265637	2.4	1.7	1.41176
N36	05D002	CASSLGQGELDDYTF	expanded	0.00625029	0.0203135	0.032814	3.25	5.25	0.619048
N36	05D002	CASSELVSHEQYF	expanded	0.00781287	0.0203135	0.0125006	2.6	1.6	1.625
N36	05D002	CASSYSGGSSGQNTQYF	expanded	0.00468772	0.0125006	0.0125006	2.66667	2.66667	1
N36	05D002	CSARANTGGTYEQYF	expanded	0.00312515	0.0171883	0.010938	5.5	3.5	1.57143
N36	05D002	CASSQDLRSYSPLYF	expanded	0.107818	0.223448	0.317202	2.07246	2.94203	0.704433
N36	05D002	CASSQDFFNQPQYF	expanded	0.00468772	0.0281263	0.0359392	6	7.66667	0.782609
N36	05D002	CASSLDRGKNSPLHF	expanded	0.193759	0.396894	0.507836	2.04839	2.62097	0.781538
N36	05D002	CASSEKGFGQGGNEQFF	expanded	0.00312515	0.0125006	0.0125006	4	4	1
N36	05D002	CASSVYRGAGTEAFF	expanded	0.0203135	0.0484398	0.0296889	2.38462	1.46154	1.63158
N36	05D002	CASNLEGEYLYEQYF	expanded	0.00781287	0.0265637	0.0125006	3.4	1.6	2.125
N36	05D002	CASSYSSRGAEAFF	expanded	0.00312515	0.010938	0.010938	3.5	3.5	1
N36	05D002	CASRSPGLGHEQYF	expanded	2.51574	6.68	3.37672	2.65528	1.34224	1.97825
N36	05D002	CASGQLNTEAFF	expanded	0.0312515	0.0734409	0.0812538	2.35	2.6	0.903846
N36	05D002	CASSYVQNSYQPQYF	expanded	0.0125006	0.0296889	0.0468772	2.375	3.75	0.633333
N36	05D002	CSARGTTPNSPLYF	emerged	-	0.0265637	0.0281263	-	-	0.944444
N36	05D002	CASSHLGPKHGNTVYF	emerged	-	0.0140632	0.0203135	-	-	0.692308
N36	05D002	CASSWGNTGGRSYTF	expanded	0.0359392	0.0812538	0.139069	2.26087	3.86957	0.58427
N36	05D002	CASSQPTGRTYNEQFF	expanded	0.00156257	0.0140632	0.0140632	9	9	1
N36	05D002	CSASWWDELIMNTEAFF	expanded	0.00625029	0.0515649	0.0390643	8.25	6.25	1.32
N36	05D002	CASSYSTGNTEAFF	expanded	0.00156257	0.021876	0.010938	14	7	2
N36	05D002	CASSQEEGGASEQFF	expanded	0.00781287	0.0359392	0.0296889	4.6	3.8	1.21053
N36	05D002	CASSYHGQPP	expanded	0.00937544	0.032814	0.0359392	3.5	3.83333	0.913043
N36	05D002	CSARIPEYF	expanded	0.00468772	0.0125006	0.0140632	2.66667	3	0.888889
N36	05D002	CASSSITGGDYTF	expanded	0.00312515	0.0125006	0.0125006	4	4	1
N36	05D002	CASSEDYSSYDYTF	expanded	0.00937544	0.0750035	0.010938	8	1.16667	6.85714
N36	05D002	CASSFTGRDYTF	emerged	-	0.010938	0.0125006	-	-	0.875
N36	05D002	CASSAGNTEAFF	expanded	0.0390643	0.0796912	0.0671906	2.04	1.72	1.18605
N36	05D002	CASSLDWGEQRETQYF	expanded	0.00468772	0.0125006	0.0265637	2.66667	5.66667	0.470588
N36	05D002	CASSLGQGVDTVYF	expanded	0.0140632	0.0640655	0.0296889	4.55556	2.11111	2.15789
N36	05D002	CASSQGQLNTEAFF	expanded	0.00312515	0.021876	0.0140632	7	4.5	1.55556
N36	05D002	CASSRGNYDYTF	expanded	0.032814	0.0890667	0.084379	2.71429	2.57143	1.05556
N36	05D002	CSARTSTGGTYEQYF	expanded	0.00312515	0.0171883	0.010938	5.5	3.5	1.57143
N36	05D002	CASSQSTGPGNSPLYF	expanded	0.0296889	0.0812538	0.0421895	2.73684	1.42105	1.92593
N36	07D122	CASSPTANTEAFF	expanded	0.00156257	0.0312515	0.0140632	20	9	2.22222
N36	07D122	CASSFAGQGPETQYF	expanded	0.00156257	0.010938	0.010938	7	7	1
N36	07D122	CASSFGTGNTEAFF	expanded	0.00156257	0.0156257	0.010938	10	7	1.42857
N36	07D122	CASSLDTYDYTF	emerged	-	0.0140632	0.0187509	-	-	0.75
N36	07D122	CASSEGGRNTQYF	expanded	0.00937544	0.0187509	0.0265637	2	2.83333	0.705882
N36	07D122	CASSQEWSPQYF	expanded	0.00468772	0.010938	0.0156257	2.33333	3.33333	0.7
N36	07D122	CSADSSYEQYF	emerged	-	0.010938	0.0125006	-	-	0.875
N36	07D122	CASSPPRGQPQYF	emerged	-	0.0281263	0.0156257	-	-	1.8
N36	07D122	CASIQGAYTEAFF	emerged	-	0.0406269	0.0703158	-	-	0.577778
N36	07D122	CASSERLREDTVYF	emerged	-	0.0140632	0.0203135	-	-	0.692308
N36	07D122	CASSYGAGYDYTF	expanded	0.125006	0.292201	0.400019	2.3375	3.2	0.730469
N36	07D122	CASSLPGTEDYTF	expanded	0.00625029	0.021876	0.0125006	3.5	2	1.75
N36	07D122	CASSQVGWGDRNTQYF	expanded	0.00625029	0.0156257	0.0250012	2.5	4	0.625
N36	07D122	CASSDTVSYEQYF	emerged	-	0.010938	0.010938	-	-	1
N36	07D122	CASQETGEETQYF	emerged	-	0.0718784	0.0203135	-	-	3.53846
N36	07D122	CASSLQAEGNTVYF	emerged	-	0.010938	0.010938	-	-	1
N36	07D122	CASSPGREGGDEQFF	expanded	0.00468772	0.0171883	0.0140632	3.66667	3	1.22222
N36	07D122	CASTGSDNEQFF	expanded	0.00468772	0.010938	0.010938	2.33333	2.33333	1
N36	07D122	CASSPTWTGFGNTQYF	emerged	-	0.0187509	0.0312515	-	-	0.6
N36	07D122	CSVERQVSYDYTF	expanded	0.00312515	0.0484398	0.0296889	15.5	9.5	1.63158
N36	07D122	CASSYSKLGPTQYF	expanded	0.00937544	0.0187509	0.0125006	2	1.33333	1.5
N36	07D122	CASRAGENTQYF	emerged	-	0.0171883	0.0187509	-	-	0.916667
N36	07D122	CASSSVGASYNEQFF	expanded	0.0250012	0.0562526	0.0625029	2.25	2.5	0.9
N36	07D122	CASSKDLREWGTQYF	emerged	-	0.0140632	0.0640655	-	-	0.219512
N36	07D122	CSASRGVETQYF	emerged	-	0.010938	0.0265637	-	-	0.411765
N36	07D122	CASSWDSDNEQFF	expanded	0.00781287	0.0156257	0.0156257	2	2	1
N36	07D122	CSVEVQGNYDYTF	emerged	-	0.0531275	0.0546901	-	-	0.971429
N36	07D122	CASSQVTDRGDEQFF	emerged	-	0.0375018	0.010938	-	-	3.42857
N36	07D122	CASSFLGAGNTVYF	emerged	-	0.0203135	0.0140632	-	-	1.44444
N36	07D122	CASSQEGDQPQYF	emerged	-	0.0203135	0.010938	-	-	1.85714
N36	07D122	CASSQFLPDYDYTF	emerged	-	0.010938	0.0125006	-	-	0.875
N36	07D122	CASSFGTANTEAFF	expanded	0.00156257	0.0140632	0.0140632	9	9	1
N36	07D122	CSAAPDGQETQYF	emerged	-	0.0531275	0.0343766	-	-	1.54545
N36	A2L097	CASSQTGTGGSSEYF	expanded	0.00156257	0.0156257	0.0171883	10	11	0.909091
N36	A2L097	CSVDRIGYGEQFF	expanded	0.00625029	0.0156257	0.0359392	2.5	5.75	0.434783
N36	A2L097	CASSPPDWGYGEQFF	expanded	0.32814	0.660968	0.734409	2.01429	2.2381	0.9
N36	A2L097	CASSRGHTAQLFF	expanded	0.00468772	0.0171883	0.0187509	3.66667	4	0.916667
N36	A2L097	CASSQDLGNQLFF	expanded	0.00156257	0.0156257	0.0140632	10	9	1.11111
N36	A2L097	CASSRTGEAFF	expanded	0.010938	0.0234386	0.0500023	2.14286	4.57143	0.46875
N36	A2L097	CASSDAGEGGPTEQYF	emerged	-	0.0296889	0.032814	-	-	0.904762
N36	A2L097	CASSRGTEAFF	expanded	0.140632	0.368767	0.357829	2.62222	2.54444	1.03057
N36	A2L097	CASSLEQEAFF	expanded	0.00468772	0.0140632	0.0156257	3	3.33333	0.9
N36	A2L097	CASSQFLQGTEAFF	emerged	-	0.0296889	0.0296889	-	-	1
N36	A2L097	CASSPDNSPLHF	expanded	0.0578152	0.154695	0.148444	2.67568	2.56757	1.04211
N36	A2L097	CSAKIGGRGNTVYF	emerged	-	0.010938	0.0468772	-	-	0.233333
N36	A2L097	CSAAGGKGEQFF	emerged	-	0.0156257	0.0156257	-	-	1
N36	A2L097	CASSAGLQYGEQFF	emerged	-	0.0125006	0.0125006	-	-	1
N36	A2L097	CASSFRAGDQPQYF	emerged	-	0.0312515	0.0125006	-	-	2.5
N36	A2L097	CASSEGRKYSNQPQYF	expanded	0.384393	1.08755	1.13755	2.82927	2.95935	0.956044
N36	A2L097	CASSESGTANEKLFF	expanded	0.00937544	0.0187509	0.0187509	2	2	1
N36	A2L097	CASSPGEKLFF	emerged	-	0.0375018	0.0437521	-	-	0.857143
N36	A2L097	CASSQGLANTAQLFF	expanded	0.00312515	0.010938	0.0156257	3.5	5	0.7
N36	A2L097	CASSYRPGAAQLFF	expanded	0.00156257	0.21251	0.0187509	136	12	11.3333
N36	A2L097	CASSSRDINEKGMFF	emerged	-	0.0281263	0.010938	-	-	2.57143
N36	A2L097	CASSSGQGDPQYF	expanded	0.00781287	0.0296889	0.0156257	3.8	2	1.9
N36	A2L097	CASSLELGEQETQYF	expanded	0.00468772	0.032814	0.021876	7	4.66667	1.5
N36	A2L097	CASSKAWGDDYTF	expanded	0.0734409	0.146882	0.165633	2	2.25532	0.886792
N36	A2L097	CASSRRTGENTQYF	expanded	0.00312515	0.0156257	0.010938	5	3.5	1.42857
N36	A2L097	CASSRQLGTAQLFF	expanded	1.72977	3.83143	3.29547	2.215	1.90515	1.16264
N36	A2L097	CSASHPGDFNQPQYF	emerged	-	0.0265637	0.0171883	-	-	1.54545
N36	A2L097	CASSSRDIPTNEKLFF	expanded	0.0171883	0.0421895	0.0531275	2.45455	3.09091	0.794118
N36	A2L097	CASSQSLTAQETQYF	expanded	0.00781287	0.0390643	0.0156257	5	2	2.5
N36	A2L097	CSADWGGKETQYF	emerged	-	0.0140632	0.0203135	-	-	0.692308
N36	A2L097	CASSRGIGEAFF	expanded	0.00468772	0.010938	0.0125006	2.33333	2.66667	0.875
N36	A2L097	CASSSGQTDYTF	expanded	0.00468772	0.0234386	0.0250012	5	5.33333	0.9375
N36	A2L097	CASSFRQGNSPLYF	expanded	0.00781287	0.0203135	0.0171883	2.6	2.2	1.18182
N36	A2L097	CASNPTGRINYDYTF	expanded	0.00625029	0.0281263	0.0156257	4.5	2.5	1.8
N36	A2L097	CASSELSGGRETQYF	expanded	0.0250012	0.0515649	0.032814	2.0625	1.3125	1.57143
N36	A2L097	CASSERQGLSTQYF	expanded	0.00156257	0.0375018	0.0171883	24	11	2.18182
N36	A2L097	CASSPGGGYAETQYF	expanded	0.00468772	0.0593778	0.0171883	12.6667	3.66667	3.45455
N36	A2L097	CASSTIGDAIDPQYF	expanded	0.357829	0.764098	0.80785	2.13537	2.25764	0.945841
N36	A2L097	CASSLIGGGEGTQYF	expanded	0.00156257	0.0140632	0.0125006	9	8	1.125
N36	A2L097	CSPTDSTDPQYF	emerged	-	0.0234386	0.0187509	-	-	1.25
N36	A2L097	CASSQDFYEQYF	emerged	-	0.021876	0.0140632	-	-	1.55556
N36	A2L097	CASSQRGTGDNEKLFF	expanded	0.00625029	0.0140632	0.0156257	2.25	2.5	0.9
N36	A2L097	CASSSQGGASGEQFF	expanded	0.0515649	0.10313	0.0703158	2	1.36364	1.46667
N36	A2L097	CSAPATGLSYDYTF	expanded	0.00156257	0.0125006	0.010938	8	7	1.14286
N36	A2L097	CASSLGDSPLYF	expanded	0.0140632	0.032814	0.0250012	2.33333	1.77778	1.3125
N36	A2L097	CASSLDEGHSGKPQYF	expanded	0.00937544	0.0187509	0.0171883	2	1.83333	1.09091
N36	A2L097	CASSIRDGYGEQFF	expanded	0.00625029	0.11563	0.0562526	18.5	9	2.05556
N36	A2L097	CSARDRQGMNSPLYF	expanded	0.00156257	0.0562526	0.0187509	36	12	3
N36	A2L097	CANGQGNQPQYF	expanded	0.00156257	0.0390643	0.0140632	25	9	2.77778
N36	A2L097	CATNGLRRGRETQYF	expanded	0.00312515	0.0296889	0.0390643	9.5	12.5	0.76
N36	A2L097	CASSRTEKLFF	expanded	0.00312515	0.571902	0.171883	183	55	3.32727
N36	A2L097	CSAPNPDWGAQETQYF	emerged	-	0.0125006	0.0125006	-	-	1
N36	A2L097	CASKAGVLNTEAFF	expanded	0.00312515	0.0781287	0.0718784	25	23	1.08696
N36	A2L097	CASSSQGPGNTVYF	expanded	0.00468772	0.010938	0.0125006	2.33333	2.66667	0.875
N36	A2L097	CASSEAGTGGRIEQYF	emerged	-	0.0281263	0.0203135	-	-	1.38462
N36	A2L097	CASSEGRTLGEQFF	expanded	0.021876	0.0593778	0.0765661	2.71429	3.5	0.77551
N36	A2L097	CASSYRTGGRDYDYTF	expanded	0.91098	2.44699	5.54714	2.68611	6.08919	0.441127
N36	A2L097	CATFLQGGNTVYF	expanded	0.287513	0.818788	0.831289	2.84783	2.8913	0.984962
N36	A2L097	CSAHGLGGAKQNTQYF	emerged	-	0.0125006	0.257825	-	-	0.0484848
N36	A2L097	CASSQDLGRTDPQYF	expanded	0.00625029	0.0250012	0.010938	4	1.75	2.28571
N36	A2L097	RSARDWTGTYEQYF	expanded	0.00781287	0.0156257	0.0156257	2	2	1
N36	A2L097	CASSRAWGERIQNTQYF	expanded	0.021876	0.0546901	0.0421895	2.5	1.92857	1.2963
N36	A2L097	CSARDWTGAYEQYF	expanded	0.00781287	0.0187509	0.0250012	2.4	3.2	0.75
N36	A2L097	CASSKRDRNQPQYF	expanded	0.00937544	0.0250012	0.0265637	2.66667	2.83333	0.941176
N36	A2L097	CASSEMDRGGDPQYF	expanded	1.01098	2.59075	2.56262	2.5626	2.53478	1.01098
N36	A2L097	CSARETDLGYTF	emerged	-	0.0734409	0.0750035	-	-	0.979167
N36	A2L097	CSARAPDYEQYF	expanded	0.00156257	0.0265637	0.0265637	17	17	1
N36	A2L097	CASSLSWGRTDPQYF	expanded	0.565652	1.38131	1.25787	2.44199	2.22376	1.09814
N36	A2L097	CASSAGTGLEKLFF	emerged	-	0.0453146	0.0234386	-	-	1.93333
N36	A2L097	CSARDWTGTYERYF	expanded	0.00468772	0.010938	0.0125006	2.33333	2.66667	0.875
N36	A2L097	CASSLVGGAEAFF	expanded	0.00781287	0.0156257	0.021876	2	2.8	0.714286
N36	A2L097	CASSEGGEETQYF	expanded	0.00781287	0.0156257	0.0125006	2	1.6	1.25
N36	A2L097	CASSQSTGVSTDPQYF	expanded	0.00781287	0.0265637	0.0171883	3.4	2.2	1.54545
N36	A2L097	CASSFGLDTEAFF	emerged	-	0.0296889	0.0125006	-	-	2.375
N36	A2L097	CASINGIYGEQFF	expanded	0.010938	0.0484398	0.135944	4.42857	12.4286	0.356322
N36	A2L097	CSAAAPDWEKTYEQYF	expanded	0.00156257	0.0265637	0.0265637	17	17	1
N36	A2L097	CASNPRATNEKLFF	expanded	0.00312515	0.0187509	0.0125006	6	4	1.5
N36	A2L097	CASSQESQNTQYF	expanded	0.010938	0.032814	0.0281263	3	2.57143	1.16667
N36	A2L097	CASSERVRKETQYF	expanded	0.0125006	0.0312515	0.0140632	2.5	1.125	2.22222
N36	A2L097	CSANRGGQNTQYF	emerged	-	0.0140632	0.0140632	-	-	1
N36	A2L097	CASSPQGGASGEQFF	expanded	0.00781287	0.021876	0.0250012	2.8	3.2	0.875
N36	A2L097	CASSKGEKLFF	emerged	-	0.0421895	0.0312515	-	-	1.35
N36	A2L097	CSARDWTGTYGQYF	expanded	0.00312515	0.0140632	0.0125006	4.5	4	1.125
N36	A5R043	CASSHPNYDYTF	expanded	0.0796912	0.193759	0.342204	2.43137	4.29412	0.56621
N36	A5R043	CSGDTMNTEAFF	expanded	0.00625029	0.0234386	0.0125006	3.75	2	1.875
N36	A5R043	CSADLGPPYEQYF	emerged	-	0.032814	0.010938	-	-	3
N36	A5R043	CASSLTAFTEAFF	emerged	-	0.0140632	0.010938	-	-	1.28571
N36	A5R043	CASSQWATTEAFS	expanded	0.00312515	0.0171883	0.0125006	5.5	4	1.375
N36	A5R043	CASTSTLLGNTVYF	expanded	0.00937544	0.0265637	0.0125006	2.83333	1.33333	2.125
N36	A5R043	CSAQPWREGDQPQYF	emerged	-	0.0187509	0.0203135	-	-	0.923077
N36	A5R043	RASSQWATTEAFF	expanded	0.00625029	0.021876	0.0156257	3.5	2.5	1.4
N36	A5R043	CASSSGTGWGEQFF	emerged	-	0.0609404	0.0390643	-	-	1.56
N36	A5R043	CVSSQWATTEAFF	emerged	-	0.0140632	0.0156257	-	-	0.9
N36	A5R043	CASSASGTGIYGEQFF	emerged	-	0.0203135	0.0203135	-	-	1
N36	A5R043	CASSPPGTTTF	expanded	0.00468772	0.0468772	0.0703158	10	15	0.666667
N36	A5R043	CASSLDRVGEKLFF	emerged	-	0.0375018	0.010938	-	-	3.42857
N36	A5R043	CASSLNGQAGGYTF	emerged	-	0.010938	0.0156257	-	-	0.7
N36	A5R043	CASSGRDRGRSPLYF	expanded	0.0125006	0.0484398	0.0406269	3.875	3.25	1.19231
N36	A5R043	CASSLRTGSRGEQFF	emerged	-	0.107818	0.084379	-	-	1.27778
N36	A5R043	CASSQLRDTSQNTQYF	emerged	-	0.0906292	0.0140632	-	-	6.44444
N36	A5R043	CASSQELGVHEQYF	expanded	0.00781287	0.0250012	0.0281263	3.2	3.6	0.888889
N36	A5R043	CASSETGTSDYTF	expanded	0.0140632	0.0906292	0.104692	6.44444	7.44444	0.865672
N36	A5R043	CASSLVRGDTAQLFF	emerged	-	0.0828164	0.0265637	-	-	3.11765
N36	A5R043	CSVLGRYSNQPQYF	emerged	-	0.021876	0.0171883	-	-	1.27273
N36	A5R043	CASSQWATIEAFF	emerged	-	0.0156257	0.010938	-	-	1.42857
N36	A5R043	CACARQGNQPQYF	expanded	0.00781287	0.0312515	0.010938	4	1.4	2.85714
N36	A5R043	CASSLASHSYEKLFF	expanded	0.00625029	0.0234386	0.0281263	3.75	4.5	0.833333
N36	A5R043	CASSQWATTEAFF	expanded	4.42521	15.0398	25.5778	3.39866	5.78001	0.588002
N36	A5R043	CASSLEGSDGEQFF	expanded	0.00937544	0.0281263	0.0500023	3	5.33333	0.5625
N36	A5R043	CASRCRQGYGEQFF	expanded	0.00468772	0.0281263	0.0187509	6	4	1.5
N36	A5R043	CASSWGDAYEQYF	expanded	0.00312515	0.0312515	0.0140632	10	4.5	2.22222
N36	A5R043	CASRDSGQETQYF	expanded	0.00312515	0.0890667	0.021876	28.5	7	4.07143
N36	A5R043	CASIPGGASTEAFF	emerged	-	0.0375018	0.0281263	-	-	1.33333
N36	A5R043	CSALGGAGLEQYF	expanded	0.00625029	0.0187509	0.0125006	3	2	1.5
N36	A5R043	CSASDRFNEKLFF	emerged	-	0.0171883	0.0125006	-	-	1.375
N36	A5R043	CASSATRGEIGNTAQLFF	expanded	0.010938	0.0234386	0.0140632	2.14286	1.28571	1.66667
N36	A5R043	CASKMDLPTEAFF	expanded	0.00312515	0.0703158	0.0250012	22.5	8	2.8125
N36	A5R043	CASSQWATTGAFF	expanded	0.00468772	0.0140632	0.0250012	3	5.33333	0.5625
N36	A5R043	CASSFLRTSQNTQYF	emerged	-	0.021876	0.010938	-	-	2
N36	A5R043	CASSYSMGSYNSPLYF	expanded	0.00156257	0.0140632	0.0156257	9	10	0.9
N36	A5R043	CSVSQGTAQLFF	emerged	-	0.0546901	0.0296889	-	-	1.84211
N36	A5R043	CATSLIDSFSTAQLFF	expanded	0.00468772	0.0140632	0.0156257	3	3.33333	0.9
N36	A5R043	CASSQ*ATTEAFF	expanded	0.00156257	0.0187509	0.0234386	12	15	0.8
N36	A5R043	CASSRDRDRPQYF	emerged	-	0.0312515	0.010938	-	-	2.85714
N36	A5R043	CASSQEWGGTDPQYF	expanded	0.335953	1.08443	1.37506	3.22791	4.09302	0.788636
N36	A5R043	CASMGETQYF	expanded	0.00937544	0.0187509	0.0140632	2	1.5	1.33333
N36	A5R043	CASSPLGDYNTAQLFF	emerged	-	0.0359392	0.0140632	-	-	2.55556
N36	A5R043	CASSQEQGGNQPQYF	expanded	0.0156257	0.0515649	0.0578152	3.3	3.7	0.891892
N36	A5R043	CASSIGGSTDPQYF	expanded	0.00156257	0.0156257	0.0187509	10	12	0.833333
N36	A5R043	CASSNPRASYEQYF	expanded	0.0187509	0.0562526	0.0656281	3	3.5	0.857143
N36	A5R043	CASSQWAATEAFF	expanded	0.00468772	0.0296889	0.0281263	6.33333	6	1.05556
N36	A5R043	CAWSRQGNQPQYF	expanded	0.00625029	0.0171883	0.010938	2.75	1.75	1.57143
N36	A5R043	CASSEKRGSIAQLFF	emerged	-	0.0390643	0.0187509	-	-	2.08333
N36	A5R043	CASSFDSSTDPQYF	expanded	0.0671906	0.234386	0.310952	3.48837	4.62791	0.753769
N36	A5R043	CSVELGSQIQETQYF	expanded	0.00156257	0.0140632	0.0140632	9	9	1
N36	A5R043	CASSQSGRNTAQLFF	expanded	0.010938	0.0468772	0.0140632	4.28571	1.28571	3.33333
N36	A5R043	CASSPPGHDYTF	expanded	0.0906292	0.182821	0.375018	2.01724	4.13793	0.4875
N36	A5R043	CASGSPWGNGDYDYTF	expanded	0.00156257	0.021876	0.0296889	14	19	0.736842
N36	A5R043	CASRRDSGASVLTF	expanded	0.00625029	0.0171883	0.021876	2.75	3.5	0.785714
N36	A5R043	CASSLGRGRQETQYF	emerged	-	0.0468772	0.0140632	-	-	3.33333
N36	A5R043	CASSLLKGGSPLHF	emerged	-	0.0437521	0.0234386	-	-	1.86667
N36	A5R043	CASRGGGGTGTYGEQFF	emerged	-	0.021876	0.010938	-	-	2
N36	A5R043	CASSHSQGYETQYF	expanded	0.0265637	0.101567	0.0500023	3.82353	1.88235	2.03125
N36	A5R043	CASMDRQSNQETQYF	expanded	0.00937544	0.0187509	0.0125006	2	1.33333	1.5
N36	A5R043	CASSHGPESSYEQYF	expanded	0.0375018	0.0984421	0.200009	2.625	5.33333	0.492187
N36	A5R043	CSVAGGVNYDYTF	expanded	0.0187509	0.095317	0.0703158	5.08333	3.75	1.35556
N36	A5R043	CASTQGGIYEQYF	emerged	-	0.032814	0.0125006	-	-	2.625
N36	A5R043	CASIREGSSNQPQYF	emerged	-	0.010938	0.0281263	-	-	0.388889
N36	A5R043	CASTQRQGTNYDYTF	emerged	-	0.032814	0.0375018	-	-	0.875
N36	A5R043	CASSEFFAGDNSPLYF	expanded	0.0156257	0.0484398	0.0859415	3.1	5.5	0.563636
N36	A5R043	CASRGQANEKLFF	expanded	0.00312515	0.0125006	0.0250012	4	8	0.5
N36	A5R043	CASSQWATTEASF	expanded	0.00468772	0.0140632	0.0250012	3	5.33333	0.5625
N36	A5R043	CASSASNGGQNTQYF	expanded	0.00937544	0.0265637	0.0468772	2.83333	5	0.566667
N36	A5R043	CASSLVRSSYEQYF	expanded	0.00625029	0.0921918	0.0234386	14.75	3.75	3.93333
N36	A5R043	CASSQGLGGQETQYF	expanded	0.0171883	0.0703158	0.0656281	4.09091	3.81818	1.07143
N36	A5R043	CASSFIRQPQYF	emerged	-	0.0265637	0.010938	-	-	2.42857
N36	A5R043	CASSLGMWTEAFF	emerged	-	0.021876	0.010938	-	-	2
N36	A5R043	CASSIGQDSGNTVYF	expanded	0.00937544	0.0390643	0.0359392	4.16667	3.83333	1.08696
N36	A5R043	CASSAHTDWGAGNTQYF	expanded	0.00312515	0.0187509	0.0390643	6	12.5	0.48
N36	A5R043	CASNWGTGDEKLFF	expanded	0.00312515	0.0187509	0.0312515	6	10	0.6
N36	A5R043	CSVLAEGSGEQYF	expanded	0.00312515	0.010938	0.010938	3.5	3.5	1
N36	A5R043	CASSQWATTEAFFGQGTRLTVVEAARF*SGPGRLCSGNTVYF	expanded	0.0359392	0.0765661	0.134381	2.13043	3.73913	0.569767
N36	A5R043	CASSKGGGPTDPQYF	emerged	-	0.010938	0.0125006	-	-	0.875
N36	A5R043	CAGSQWATTEAFF	expanded	0.00312515	0.0125006	0.0390643	4	12.5	0.32
N36	A5R043	CASSLVYGEQFF	expanded	0.00156257	0.0296889	0.010938	19	7	2.71429
N36	A5R043	CASSQRATTEAFF	expanded	0.00312515	0.0171883	0.0187509	5.5	6	0.916667
N36	A5R043	CASSEIETQYF	expanded	0.0125006	0.10938	0.0437521	8.75	3.5	2.5
N36	A5R043	CASRQQVERNTVYF	emerged	-	0.16407	0.0703158	-	-	2.33333
N36	A5R043	CASGQWATTEAFF	emerged	-	0.010938	0.0265637	-	-	0.411765
N36	A5R043	CASSVEGGVNTEAFF	expanded	0.00625029	0.0171883	0.010938	2.75	1.75	1.57143
N36	A5R043	CASSLLRQPSAAQLFF	emerged	-	0.0671906	0.0187509	-	-	3.58333
N36	A5R043	CASTGEGNSPLHF	expanded	0.00312515	0.0281263	0.0203135	9	6.5	1.38462
N36	A5R043	CASSQWATTEAFL	expanded	0.00312515	0.0312515	0.0406269	10	13	0.769231
N36	A5R043	CASSDQRGPQYF	emerged	-	0.0343766	0.0156257	-	-	2.2
N36	A5R043	CASSSGQAGWGTPNTEAFF	expanded	0.00156257	0.010938	0.0125006	7	8	0.875
N36	A5R043	CASSLIRTGFEQYF	emerged	-	0.0234386	0.0171883	-	-	1.36364
N36	A5R043	CASSSGTGGPHEQYF	expanded	0.0312515	0.0671906	0.0453146	2.15	1.45	1.48276
N36	A5R043	CASRTTKDGEAFF	emerged	-	0.0656281	0.0234386	-	-	2.8
N36	A5R043	CASSSAGEVQNTQYF	expanded	0.00156257	0.0609404	0.0281263	39	18	2.16667
N36	A5R043	CASSRDGGNTVYF	expanded	0.00937544	0.032814	0.0187509	3.5	2	1.75
N36	A5R043	CASSSPDLSETQYF	expanded	0.00156257	0.0125006	0.0140632	8	9	0.888889
N36	A5R043	CSAKGNTEAFF	expanded	0.00625029	0.0156257	0.021876	2.5	3.5	0.714286
N36	A5R043	CASKADRYQPQYF	emerged	-	0.0125006	0.0125006	-	-	1
N36	A5R043	CASSDLHHINYDYTF	expanded	0.00937544	0.0203135	0.0156257	2.16667	1.66667	1.3
N36	A5R043	CASRALANTAQLFF	expanded	0.387518	0.925043	1.01724	2.3871	2.625	0.90937
N36	A5R043	CASWGGYGEQFF	expanded	0.00156257	0.0281263	0.0140632	18	9	2
N36	A5R043	CASSVTGSVQPQYF	expanded	0.00781287	0.0203135	0.0171883	2.6	2.2	1.18182
N36	A6L108	CASSSVGTATDPQYF	expanded	0.00156257	0.0156257	0.0140632	10	9	1.11111
N36	A6L108	CASSVNSLSNQPQYF	emerged	-	0.010938	0.0156257	-	-	0.7
N36	A6L108	CASSQYQGSNSPLHF	expanded	0.0281263	0.0671906	0.0765661	2.38889	2.72222	0.877551
N36	A6L108	CASSRGIGDCTF	expanded	0.00625029	0.0140632	0.0125006	2.25	2	1.125
N36	A6L108	CASSEFGGNGNQPQYF	expanded	0.00468772	0.010938	0.0156257	2.33333	3.33333	0.7
N36	A6L108	CASSSHRDRPLQDYTF	expanded	0.0171883	0.0531275	0.0687532	3.09091	4	0.772727
N36	A6L108	CASSSPRWDSEAFF	expanded	0.00312515	0.0187509	0.0171883	6	5.5	1.09091
N36	A6L108	CASGPGGRRDYDYTF	expanded	0.00312515	0.0156257	0.0156257	5	5	1
N36	A6L108	CASSIQGGQNTQYF	expanded	0.00468772	0.226573	0.0578152	48.3333	12.3333	3.91892
N36	A6L108	CASTETGTSGSVGDYTF	expanded	0.00156257	0.0156257	0.010938	10	7	1.42857
N36	A6L108	CASSFSTDNEAFF	expanded	0.00156257	0.0171883	0.010938	11	7	1.57143
N36	A6L108	CASIRNSGNTVYF	expanded	0.00468772	0.0312515	0.0234386	6.66667	5	1.33333
N36	A6L108	CASSFGEGPSGNTVYF	expanded	0.0203135	0.0484398	0.0312515	2.38462	1.53846	1.55
N36	A6L108	CAGSRGIGDYTF	expanded	0.00625029	0.0171883	0.0187509	2.75	3	0.916667
N36	A6L108	CASSQGAGPDPQYF	expanded	0.0484398	0.10938	0.0890667	2.25806	1.83871	1.22807
N36	A6L108	CSVGTGLGEKLFF	expanded	0.00312515	0.0125006	0.0125006	4	4	1
N36	A6L108	CASSQYPRNTEAFF	expanded	0.0937544	0.231261	0.226573	2.46667	2.41667	1.02069
N36	A6L108	CASSRPTGGRQSEQYF	expanded	0.0421895	0.0859415	0.0890667	2.03704	2.11111	0.964912
N36	A6L108	CASSPGTGGTNTAQLFF	expanded	0.0171883	0.0593778	0.0421895	3.45455	2.45455	1.40741
N36	A6L108	CGSSYSGTGNEKLFF	expanded	0.00781287	0.0250012	0.0390643	3.2	5	0.64
N36	A6L108	CASSPGPPIQNTQYF	expanded	0.00156257	0.0406269	0.0203135	26	13	2
N36	A6L108	CASSLSGTGAYEQYF	expanded	0.220323	0.450021	0.468772	2.04255	2.12766	0.96
N36	A6L108	CSAAGQGATEAFF	expanded	0.00312515	0.0140632	0.0140632	4.5	4.5	1
N36	A6L108	CASSQAWETQYF	emerged	-	0.0140632	0.0140632	-	-	1
N36	A6L108	CASSKAWGQGDEKLFF	expanded	0.00468772	0.010938	0.0156257	2.33333	3.33333	0.7
N36	A6L108	CASSQGQLYEQYF	expanded	0.0171883	0.0359392	0.0234386	2.09091	1.36364	1.53333
N36	A6L108	CASSQDPGYSPLYF	expanded	0.0187509	0.0484398	0.0578152	2.58333	3.08333	0.837838
N36	A6L108	CASGLGGFGNTQYF	expanded	1.41882	3.07202	3.44547	2.1652	2.42841	0.89161
N36	A6L108	CASSQDSYYEQYF	expanded	0.00156257	0.010938	0.0187509	7	12	0.583333
N36	A6L108	CASSYGLGQETQYF	emerged	-	0.0250012	0.0203135	-	-	1.23077
N51	04D323	CASSQGLGGGYTAQLFF	expanded	0.00156257	0.0140632	0.0125006	9	8	1.125
N51	04D323	CASSEILNTAQLFF	expanded	0.00156257	0.0203135	0.0125006	13	8	1.625
N51	04D323	CASSLGGIPGEQYF	expanded	0.00937544	0.0265637	0.0171883	2.83333	1.83333	1.54545
N51	04D323	CASSQDGETQYF	emerged	-	0.0140632	0.0125006	-	-	1.125
N51	04D323	CASSHQYGETEAFF	emerged	-	0.021876	0.0203135	-	-	1.07692
N51	04D323	CASSQGTGGLGAAQLFF	expanded	0.0171883	0.0453146	0.0343766	2.63636	2	1.31818
N51	04D323	CSVARMGSEQYF	expanded	0.00312515	0.0546901	0.0203135	17.5	6.5	2.69231
N51	04D323	CASSPAEQDYGEQFF	expanded	0.00937544	0.0546901	0.0250012	5.83333	2.66667	2.1875
N51	04D323	CASSGDREVAQLFF	expanded	0.00156257	0.010938	0.0140632	7	9	0.777778
N51	04D323	CASSLHMTGKSYEQYF	expanded	0.00312515	0.0125006	0.0187509	4	6	0.666667
N51	04D323	CASSLDGNSGNTVYF	expanded	0.0140632	0.0312515	0.0312515	2.22222	2.22222	1
N51	04D323	CASSQELGIETQYF	expanded	0.00937544	0.0187509	0.0234386	2	2.5	0.8
N51	04D323	CASSQDPGPTEAFF	emerged	-	0.0156257	0.0156257	-	-	1
N51	04D323	CASLGGELGGKDEQFF	expanded	0.00625029	0.0156257	0.0125006	2.5	2	1.25
N51	04D323	CASSFPGQGNEKLFF	emerged	-	0.021876	0.0156257	-	-	1.4
N51	04D323	CASCQLDSQNTQYF	expanded	0.010938	0.0281263	0.0343766	2.57143	3.14286	0.818182
N51	04D323	CASSQDLGQETQYF	emerged	-	0.0312515	0.0156257	-	-	2
N51	04D323	CASSQVSNSPLHF	expanded	0.00156257	0.0140632	0.0140632	9	9	1
N51	04D323	CASRLGGTSNSGASVLTF	expanded	0.00781287	0.0203135	0.010938	2.6	1.4	1.85714
N51	04D323	CASSPLTGTNSYEQYF	expanded	0.00625029	0.0156257	0.0125006	2.5	2	1.25
N51	04D323	CASSQGQGTLGGYNEQFF	expanded	0.00625029	0.0281263	0.0562526	4.5	9	0.5
N51	04D323	CASSYSNWANTEAFF	expanded	0.00468772	0.0437521	0.0171883	9.33333	3.66667	2.54545
N51	04D323	CASSLFRNTYNEQFF	emerged	-	0.0125006	0.0187509	-	-	0.666667
N51	04D323	CASSSDSNTAQLFF	emerged	-	0.0171883	0.010938	-	-	1.57143
N51	04D323	CASSVDWDTNTAQLFF	expanded	0.00937544	0.0234386	0.0187509	2.5	2	1.25
N51	04D323	CSAKVQGVHDYTF	expanded	0.0171883	0.0671906	0.0406269	3.90909	2.36364	1.65385
N51	04D323	CSDRDCERRETQYF	expanded	0.00156257	0.0250012	0.0140632	16	9	1.77778
N51	04D323	CASSQDIPGEEVMDDYTF	expanded	0.00312515	0.0156257	0.0140632	5	4.5	1.11111
N51	04D323	CASSLSDWGETYEQYF	expanded	0.00468772	0.270325	0.0500023	57.6667	10.6667	5.40625
N51	04D323	CASSYTGDSGASVLTF	emerged	-	0.0296889	0.0187509	-	-	1.58333
N51	04D323	CASSAGNTEAFF	expanded	0.0500023	0.126568	0.0562526	2.53125	1.125	2.25
N51	04D323	CASSLSPGQSNEKLFF	expanded	0.032814	0.168758	0.0671906	5.14286	2.04762	2.51163
N51	04D323	CASSLYEGSGGNTVYF	expanded	0.00156257	0.010938	0.010938	7	7	1
N51	04D323	CASSLAGRNQETQYF	expanded	0.00468772	0.0234386	0.0156257	5	3.33333	1.5
N51	04D323	CASSLGPGFYNEQFF	expanded	0.00937544	0.0281263	0.0203135	3	2.16667	1.38462
N51	04D323	CASSLESQGADYTF	expanded	0.0156257	0.0468772	0.0234386	3	1.5	2
N51	04D323	CASSYPEWDTQYF	expanded	0.010938	0.0703158	0.0203135	6.42857	1.85714	3.46154
N51	04D323	CASSQDRGSRDPQYF	expanded	0.00156257	0.0171883	0.010938	11	7	1.57143
N51	04D323	CASSTSASGASVLTF	expanded	0.00468772	0.010938	0.010938	2.33333	2.33333	1
N51	04D323	CASSQEDGNGNTVYF	emerged	-	0.0140632	0.010938	-	-	1.28571
N51	04D323	CASSHSGTGVVNEQFF	expanded	0.00625029	0.0171883	0.0375018	2.75	6	0.458333
N51	04D323	CASRKTGGNTVYF	emerged	-	0.032814	0.010938	-	-	3
N51	04D323	CASSFGTAIYEQYF	expanded	0.0500023	0.112505	0.0671906	2.25	1.34375	1.67442
N51	04D323	CASVQGELGTQYF	emerged	-	0.0203135	0.0140632	-	-	1.44444
N51	04D323	CASSQDLEDVSYEQYF	expanded	0.00625029	0.0390643	0.0359392	6.25	5.75	1.08696
N51	04D323	CASSGTGGRYGEQFF	expanded	0.00781287	0.0265637	0.0296889	3.4	3.8	0.894737
N51	04D323	CSARDWGEHEQYF	expanded	0.021876	0.0546901	0.0546901	2.5	2.5	1
N51	04D323	CASSQSTGTDLETQYF	expanded	0.0125006	0.0390643	0.0546901	3.125	4.375	0.714286
N51	04D323	CASSQIGGRIGPQYF	expanded	0.0203135	0.0437521	0.0359392	2.15385	1.76923	1.21739
N51	04D323	CASSQEGGGRSISF	expanded	0.00468772	0.010938	0.0343766	2.33333	7.33333	0.318182
N51	04D323	CASTKNEGRRGEKLFF	expanded	0.00156257	0.0156257	0.0171883	10	11	0.909091
N51	04D323	CASGPDRKLFF	expanded	0.00625029	0.0250012	0.0140632	4	2.25	1.77778
N51	04D323	CSASVDANTVYF	expanded	0.00312515	0.128131	0.032814	41	10.5	3.90476
N51	04D323	CASGRGNTAQLFF	emerged	-	0.0203135	0.010938	-	-	1.85714
N51	04D323	CASSRRTSHEQYF	expanded	0.0187509	0.0453146	0.0562526	2.41667	3	0.805556
N51	04D323	CASSLTEGSTDPQYF	expanded	0.00625029	0.021876	0.021876	3.5	3.5	1
N51	04D323	CASSQRVNYEQYF	expanded	0.010938	0.168758	0.0875041	15.4286	8	1.92857
N51	04D323	CASSPRQETQYF	expanded	0.00312515	0.0140632	0.0343766	4.5	11	0.409091
N51	04D323	CASSLAYEQFF	expanded	0.00781287	0.0265637	0.0234386	3.4	3	1.13333
N51	04D323	CASSLQGWETQYF	expanded	0.0156257	0.032814	0.0406269	2.1	2.6	0.807692
N51	04D323	CASSRLWTGEGNTQYF	expanded	0.00156257	0.021876	0.0250012	14	16	0.875
N51	04D323	CARSANRGNNSPLHF	emerged	-	0.0437521	0.0187509	-	-	2.33333
N51	04D323	CASSPTGLGAEAFF	expanded	0.021876	0.084379	0.0531275	3.85714	2.42857	1.58824
N51	04D323	CASRSGSTEAFF	expanded	0.0140632	0.0750035	0.0281263	5.33333	2	2.66667
N51	04D323	CASSEVWGELPDPQYF	emerged	-	0.0375018	0.0156257	-	-	2.4
N51	04D323	CASSEIDSNTEQYF	expanded	0.00156257	0.0781287	0.0125006	50	8	6.25
N51	04D323	CASSQLMTGANYDYTF	expanded	0.00625029	0.0296889	0.010938	4.75	1.75	2.71429
N51	04D323	CASSEGGLGNEQFF	emerged	-	0.010938	0.0171883	-	-	0.636364
N51	04D323	CASSQSTDRDNYEQYF	expanded	0.0234386	0.0500023	0.0281263	2.13333	1.2	1.77778
N51	04D323	CSVGPPGGEQYF	expanded	0.00468772	0.010938	0.0187509	2.33333	4	0.583333
N51	04D323	CASSSPGTKNTQYF	expanded	0.00468772	0.0156257	0.0125006	3.33333	2.66667	1.25
N51	04D323	CASSSGPQETQYF	expanded	0.010938	0.0453146	0.0578152	4.14286	5.28571	0.783784
N51	04D323	CASREGLVWEQYF	expanded	0.00312515	0.0281263	0.010938	9	3.5	2.57143
N51	04D323	CASSPMGGEGPDYTF	expanded	0.00156257	0.021876	0.0125006	14	8	1.75
N51	04D323	CASSPWTGGSWETQYF	emerged	-	0.0515649	0.0421895	-	-	1.22222
N51	04D323	CATSDFGTGSSYEQYF	emerged	-	0.0234386	0.0171883	-	-	1.36364
N51	04D323	CASGDPGLAPYTAQLFF	expanded	0.0203135	0.0421895	0.0343766	2.07692	1.69231	1.22727
N51	04D323	CASSQDRGTYEQYF	expanded	0.0359392	0.0828164	0.0875041	2.30435	2.43478	0.946429
N51	04D323	CSVERGLKLQETQYF	expanded	0.00312515	0.0234386	0.010938	7.5	3.5	2.14286
N51	04D323	CASRQGRLTEAFF	expanded	0.010938	0.0343766	0.021876	3.14286	2	1.57143
N51	04D323	CASSEGSGVRDPQYF	expanded	0.00156257	0.0125006	0.0125006	8	8	1
N51	04D323	CASSPDWFRQNTQYF	expanded	0.00625029	0.0171883	0.0125006	2.75	2	1.375
N51	04D323	CASNGDPQYF	expanded	0.0125006	0.0296889	0.0140632	2.375	1.125	2.11111
N51	04D323	CASSPSLGNEKLFF	emerged	-	0.0359392	0.0250012	-	-	1.4375
N51	04D323	CASKGPSQNTQYF	expanded	0.00312515	0.0125006	0.0140632	4	4.5	0.888889
N51	04D323	CASSGLKSYNEQFF	expanded	0.00468772	0.0140632	0.0171883	3	3.66667	0.818182
N51	04D323	CASSRGNTEAFF	expanded	0.00312515	0.0312515	0.010938	10	3.5	2.85714
N51	04D323	CASSEKTGGTYNEQFF	emerged	-	0.0343766	0.084379	-	-	0.407407
N51	04D323	CASSQEGEGTGAEKLFF	expanded	0.00781287	0.021876	0.0140632	2.8	1.8	1.55556
N51	04D323	CATSIPGVSGASVLTF	expanded	0.00625029	0.0296889	0.0125006	4.75	2	2.375
N51	04D323	CASSLFGEEGYEQYF	expanded	0.0203135	0.0453146	0.0609404	2.23077	3	0.74359
N51	05D131	CASRTGGSTDPQYF	expanded	0.00312515	0.0125006	0.0125006	4	4	1
N51	05D131	CSVGTLRETQYF	emerged	-	0.021876	0.0125006	-	-	1.75
N51	05D131	CASTADQETQYF	emerged	-	0.0156257	0.010938	-	-	1.42857
N51	05D131	CSARGGEGPGNTVYF	emerged	-	0.0796912	0.0156257	-	-	5.1
N51	05D131	CASSKEVTNTAQLFF	expanded	0.00156257	0.0187509	0.010938	12	7	1.71429
N51	05D131	CSARVGQGSDYTF	emerged	-	0.0484398	0.010938	-	-	4.42857
N51	05D131	CSAPGQVTDPQYF	expanded	0.00781287	0.0156257	0.0171883	2	2.2	0.909091
N51	05D131	CASSRTLSEGSQNTQYF	expanded	0.0437521	0.0968795	0.110943	2.21429	2.53571	0.873239
N51	05D131	CASSQTGADTAQLFF	emerged	-	0.0265637	0.0593778	-	-	0.447368
N51	05D131	CASGLTGRVYEQYF	expanded	0.00156257	0.0531275	0.0140632	34	9	3.77778
N51	05D131	CASSERLGGYGEQFF	expanded	0.0234386	0.0468772	0.104692	2	4.46667	0.447761
N51	05D131	CASSTYPQGSGYDYTF	expanded	0.0500023	0.106255	0.0921918	2.125	1.84375	1.15254
N51	05D131	CSAQPDTTNEKLFF	expanded	0.0171883	0.0484398	0.0546901	2.81818	3.18182	0.885714
N51	05D131	CASSLLGGVEEKLFF	expanded	0.021876	0.0500023	0.0687532	2.28571	3.14286	0.727273
N51	05D131	CASSSRAPGSQYF	emerged	-	0.0140632	0.010938	-	-	1.28571
N51	05D131	CASSATGYDYTF	emerged	-	0.0343766	0.0234386	-	-	1.46667
N51	05D131	CASLRDSSYEQYF	expanded	0.00312515	0.0234386	0.010938	7.5	3.5	2.14286
N51	05D131	CASSLFNSGRYEQYF	expanded	0.00937544	0.021876	0.0187509	2.33333	2	1.16667
N51	05D131	CASSLTNTAQLFF	expanded	0.00312515	0.0187509	0.0125006	6	4	1.5
N51	05D131	CASSQVGREGYDYTF	expanded	0.0125006	0.0312515	0.0265637	2.5	2.125	1.17647
N51	05D131	CSARGGGPDNSPLYF	expanded	0.00937544	0.0312515	0.0156257	3.33333	1.66667	2
N51	05D131	CASSYDGGREGEAFF	emerged	-	0.0281263	0.0296889	-	-	0.947368
N51	05D131	CASSAGTANTQYF	expanded	0.395331	0.818788	0.787537	2.07115	1.99209	1.03968
N51	05D131	CASSSKTGGYQETQYF	expanded	0.00937544	0.0296889	0.0203135	3.16667	2.16667	1.46154
N51	05D131	CASSQGTGGRGEQFF	expanded	0.0609404	0.131256	0.162508	2.15385	2.66667	0.807692
N51	05D131	CASKVVGEQFF	emerged	-	0.0359392	0.010938	-	-	3.28571
N51	05D131	CSARRGNSQNTQYF	expanded	0.0125006	0.0312515	0.0250012	2.5	2	1.25
N51	05D131	CASSQDVGTGVREKLFF	expanded	0.00781287	0.0203135	0.021876	2.6	2.8	0.928571
N51	05D131	CASSPDTYQPQYF	expanded	0.0890667	0.21876	0.292201	2.45614	3.2807	0.748663
N51	05D131	CASSLVQGLHDYTF	expanded	0.0234386	0.0609404	0.0593778	2.6	2.53333	1.02632
N51	05D131	CASNPIRDRNAGEQFF	expanded	0.00468772	0.0125006	0.0156257	2.66667	3.33333	0.8
N51	05D131	CASSPRGTDPQYF	emerged	-	0.0421895	0.0203135	-	-	2.07692
N51	05D131	CSASAGSGNTVYF	expanded	0.190634	0.421895	0.475022	2.21311	2.4918	0.888158
N51	05D131	CSASSGGAQVNTEAFF	emerged	-	0.0640655	0.0125006	-	-	5.125
N51	05D131	CASNDGQGGRQQYF	expanded	0.00781287	0.0187509	0.0203135	2.4	2.6	0.923077
N51	05D131	CASSSDWVESYEQYF	expanded	0.00156257	0.0390643	0.0296889	25	19	1.31579
N51	05D131	CASSHRERNSPLYF	expanded	0.00937544	0.021876	0.0171883	2.33333	1.83333	1.27273
N51	05D131	CASTSVSYEQYF	emerged	-	0.0453146	0.010938	-	-	4.14286
N51	05D131	CASRERDRGNEKLFF	expanded	0.476585	1.64695	1.53913	3.45574	3.22951	1.07005
N51	05D131	CASSKSTGPNTAQLFF	emerged	-	0.021876	0.010938	-	-	2
N51	05D131	CSARDTANYDYTF	emerged	-	0.0125006	0.010938	-	-	1.14286
N51	05D131	CASRGTGFGWNTEAFF	emerged	-	0.0812538	0.0187509	-	-	4.33333
N51	05D131	CASRLQGINSPLYF	expanded	0.00312515	0.0203135	0.0265637	6.5	8.5	0.764706
N51	05D131	CASSRTPGQIYDYTF	expanded	0.0875041	0.20626	0.231261	2.35714	2.64286	0.891892
N51	05D131	CASSRSEYRSEAFF	emerged	-	0.0187509	0.0171883	-	-	1.09091
N51	05D131	CATSTGNYGEQFF	expanded	0.00468772	0.0750035	0.0171883	16	3.66667	4.36364
N51	05D131	CASSVPARGEQFF	emerged	-	0.0515649	0.010938	-	-	4.71429
N51	05D131	CASSQTGGGNQPQYF	emerged	-	0.0234386	0.010938	-	-	2.14286
N51	05D131	CASSLYGQGSGNTVYF	emerged	-	0.0296889	0.0203135	-	-	1.46154
N51	05D131	CASGTGGRNPQYF	expanded	0.00468772	0.010938	0.010938	2.33333	2.33333	1
N51	05D131	CASSPGTDYNSPLYF	emerged	-	0.0265637	0.0156257	-	-	1.7
N51	05D131	CASSEGEGGVEKLFF	emerged	-	0.101567	0.0375018	-	-	2.70833
N51	05D131	CASSLGPGTAQLFF	emerged	-	0.0187509	0.0281263	-	-	0.666667
N51	05D131	CASSEAGGGYDYTF	emerged	-	0.0343766	0.010938	-	-	3.14286
N51	05D131	CSVDRDWGGTRYF	expanded	0.0359392	0.0765661	0.0640655	2.13043	1.78261	1.19512
N51	05D131	CASKGGSNYDYTF	emerged	-	0.0265637	0.0140632	-	-	1.88889
N51	05D131	CASSGRETQYF	emerged	-	0.021876	0.0421895	-	-	0.518519
N51	05D131	CASSLELLQNTQYF	expanded	0.0234386	0.0781287	0.0578152	3.33333	2.46667	1.35135
N51	05D131	CASSRMQSRPEAFF	expanded	0.135944	0.304702	0.268763	2.24138	1.97701	1.13372
N51	05D131	CSARYRGGYEQYF	expanded	0.00156257	0.0281263	0.0125006	18	8	2.25
N51	05D131	CASSEASGRGTVYF	emerged	-	0.106255	0.0171883	-	-	6.18182
N51	05D131	CASSDPGNTEAFF	expanded	0.0140632	0.0390643	0.0546901	2.77778	3.88889	0.714286
N51	05D131	CASSDLGGSNQPQYF	emerged	-	0.010938	0.0125006	-	-	0.875
N51	05D131	CASSKGGEKLFF	expanded	0.00468772	0.0906292	0.0484398	19.3333	10.3333	1.87097
N51	05D131	CSAQKRGANEKLFF	expanded	0.00312515	0.0156257	0.0140632	5	4.5	1.11111
N51	05D131	CATSAPGTPNTQYF	expanded	0.120318	0.243761	0.335953	2.02597	2.79221	0.725581
N51	05D131	CASRRGVGRSYGEQFF	expanded	0.201572	0.550026	0.964108	2.72868	4.78295	0.570502
N51	05D131	CASTPNTYSGNTVYF	emerged	-	0.0234386	0.0156257	-	-	1.5
N51	05D131	CASRNEKLFF	emerged	-	0.0375018	0.0125006	-	-	3
N51	05D131	CASSLEGYDYTF	expanded	0.00468772	0.032814	0.010938	7	2.33333	3
N51	05D131	CATSLGTVINQPQYF	expanded	0.00156257	0.0125006	0.0125006	8	8	1
N51	05D131	CASSVQRFSPLYF	expanded	0.00937544	0.0437521	0.0390643	4.66667	4.16667	1.12
N51	05D131	CASKTGPQYF	emerged	-	0.0171883	0.0187509	-	-	0.916667
N51	05D131	CASSQDYRGRYGNTVYF	expanded	0.00625029	0.0156257	0.0296889	2.5	4.75	0.526316
N51	05D131	CASRQEKTGEDWGGSYEQYF	expanded	0.00781287	0.0156257	0.010938	2	1.4	1.42857
N51	05D131	CASSYRVVNSPLYF	expanded	0.00156257	0.0296889	0.0125006	19	8	2.375
N51	05D131	CASSYSAGLSTF	expanded	0.732847	1.81415	1.97978	2.47548	2.70149	0.916338
N51	05D131	CASSQDGRESLQYF	emerged	-	0.0359392	0.0625029	-	-	0.575
N51	05D131	CASSNPGPSNPQYF	expanded	0.00781287	0.0171883	0.0187509	2.2	2.4	0.916667
N51	05D131	CASSSDRVETQYF	emerged	-	0.0140632	0.010938	-	-	1.28571
N51	05D131	CSVEDRGLDTVYF	expanded	0.0750035	0.153132	0.217198	2.04167	2.89583	0.705036
N51	07D075	CASSLRGWSYNEQFF	expanded	0.00625029	0.0156257	0.0125006	2.5	2	1.25
N51	07D075	CASRAGVNTEAFF	expanded	0.00937544	0.0281263	0.0125006	3	1.33333	2.25
N51	07D075	CASSWTGEQGNTVYF	expanded	0.0156257	0.0671906	0.0453146	4.3	2.9	1.48276
N51	07D075	CASSLQISYNEQFF	expanded	0.00781287	0.0187509	0.0234386	2.4	3	0.8
N51	07D075	CASSEVPAADPQYF	expanded	0.0187509	0.0406269	0.032814	2.16667	1.75	1.2381
N51	07D075	CASSLTSLADPQYF	expanded	0.00781287	0.0156257	0.0312515	2	4	0.5
N51	07D075	CASRPISQGLYNSPLYF	expanded	0.021876	0.0609404	0.0656281	2.78571	3	0.928571
N51	07D075	CASGKGYASGNTVYF	emerged	-	0.0718784	0.0171883	-	-	4.18182
N51	07D075	CASSVNRGSGNTVYF	expanded	0.0140632	0.0296889	0.021876	2.11111	1.55556	1.35714
N51	07D075	CASSPNPKETQYF	expanded	0.00937544	0.0203135	0.010938	2.16667	1.16667	1.85714
N51	07D075	CASSSNPWTGFNSPLYF	expanded	0.00312515	0.0187509	0.010938	6	3.5	1.71429
N51	07D075	CASSRIGDSNTEAFF	expanded	0.0156257	0.032814	0.021876	2.1	1.4	1.5
N51	07D075	CASSYGQAFNQPQYF	expanded	0.010938	0.0375018	0.0265637	3.42857	2.42857	1.41176
N51	07D075	CSARDQTGYHDYTF	expanded	0.293764	0.789099	0.812538	2.68617	2.76596	0.971154
N51	07D075	CASSHSFDGQVIYDYTF	expanded	0.00625029	0.0140632	0.0140632	2.25	2.25	1
N51	07D075	CASRDRGNEKLFF	expanded	0.00468772	0.0156257	0.0187509	3.33333	4	0.833333
N51	07D075	CASSHVGGGNQPQYF	expanded	0.00468772	0.0234386	0.010938	5	2.33333	2.14286
N51	07D075	CASSYRDSSDYTF	expanded	0.0281263	0.101567	0.0859415	3.61111	3.05556	1.18182
N51	07D075	CASSTGTYEQYF	expanded	0.0140632	0.0453146	0.0265637	3.22222	1.88889	1.70588
N51	07D075	CASSDELAYGEQFF	emerged	-	0.0281263	0.0140632	-	-	2
N51	07D075	CASSFSLTETQYF	emerged	-	0.0625029	0.0437521	-	-	1.42857
N51	07D075	CASSFEVGTAQLFF	expanded	0.00312515	0.0140632	0.0156257	4.5	5	0.9
N51	07D075	CSASPDGPYEQYF	expanded	0.00156257	0.0718784	0.0203135	46	13	3.53846
N51	07D075	CSAGQGGKNSPLHF	expanded	0.00312515	0.0265637	0.0171883	8.5	5.5	1.54545
N51	07D075	CASSYPGEEQYF	expanded	0.0796912	0.204697	0.185946	2.56863	2.33333	1.10084
N51	07D075	CASSSGDRGDEQYF	expanded	0.00468772	0.0171883	0.0343766	3.66667	7.33333	0.5
N51	07D075	CASSQIGSSNEKLFF	expanded	0.0296889	0.0625029	0.0531275	2.10526	1.78947	1.17647
N51	07D075	CASSEAEVSGYTF	expanded	0.00625029	0.0171883	0.0140632	2.75	2.25	1.22222
N51	07D075	CASSMSQGGAYEQYF	expanded	0.00625029	0.0140632	0.0140632	2.25	2.25	1
N51	07D075	CSARDRDAYYEQYF	expanded	0.00781287	0.0156257	0.0265637	2	3.4	0.588235
N51	07D075	CASRRPHVYDYTF	expanded	0.00625029	0.0250012	0.0125006	4	2	2
N51	07D075	CASSLELAAQLFF	expanded	0.00625029	0.0343766	0.0171883	5.5	2.75	2
N51	07D075	CASRQYDYTF	expanded	0.00312515	0.0140632	0.021876	4.5	7	0.642857
N51	07D075	CSARDQAGLETQYF	emerged	-	0.0250012	0.010938	-	-	2.28571
N51	07D075	CASRGDGATNEKLFF	expanded	2.20167	4.85648	4.30176	2.20582	1.95387	1.12895
N51	07D075	CASSPSTETNYDYTF	expanded	0.0156257	0.0375018	0.0234386	2.4	1.5	1.6
N51	07D075	CASSLEWAGSNTQYF	expanded	0.00468772	0.010938	0.0187509	2.33333	4	0.583333
N51	07D075	CSIWGDNDYTF	expanded	0.00312515	0.175008	0.0593778	56	19	2.94737
N51	07D075	CASSPWDITNTAQLFF	expanded	0.00781287	0.0171883	0.032814	2.2	4.2	0.52381
N51	07D075	CASSQERGDRGDEKLFF	expanded	0.00625029	0.0312515	0.0171883	5	2.75	1.81818
N51	07D075	CSARAGGVVYGEQFF	expanded	0.0343766	0.0765661	0.0671906	2.22727	1.95455	1.13953
N51	07D075	CASSQSGQGNTVYF	expanded	0.0312515	0.0765661	0.0484398	2.45	1.55	1.58065
N51	07D075	CASSGTALGEAFF	expanded	0.334391	0.804725	0.676594	2.40654	2.02336	1.18938
N51	07D075	CASSYMPQPNYDYTF	emerged	-	0.0156257	0.010938	-	-	1.42857
N51	07D075	CASSPSTGPVQNTQYF	expanded	0.0343766	0.0703158	0.0500023	2.04545	1.45455	1.40625
N51	07D075	CASFREVGEAYYDYTF	expanded	0.0125006	0.032814	0.0281263	2.625	2.25	1.16667
N51	07D075	CSAPPGTGSETQYF	expanded	0.0531275	0.120318	0.106255	2.26471	2	1.13235
N51	07D075	CASRGRENTEAFF	expanded	0.00156257	0.0125006	0.010938	8	7	1.14286
N51	07D075	CASSIWDRDYYTF	expanded	0.00625029	0.0187509	0.0156257	3	2.5	1.2
N51	07D075	CASRGTGSFMNTEAFF	expanded	0.00781287	0.0234386	0.0140632	3	1.8	1.66667
N51	07D075	CASSPYQGNGNQPQYF	expanded	0.00312515	0.0156257	0.0140632	5	4.5	1.11111
N51	07D075	CAMHTTRQGGTEAFF	expanded	0.00156257	0.0125006	0.0156257	8	10	0.8
N51	07D075	CASSPSGGRDTQYF	expanded	0.00781287	0.0187509	0.0203135	2.4	2.6	0.923077
N51	07D075	CASSKDDGTGFPDPQYF	expanded	0.00937544	0.021876	0.0203135	2.33333	2.16667	1.07692
N51	07D075	CASSDPSVYEQYF	expanded	0.0187509	0.0390643	0.0375018	2.08333	2	1.04167
N51	07D075	CSVLTVNYDYTF	expanded	0.032814	0.0781287	0.0546901	2.38095	1.66667	1.42857
N51	07D075	CASRQGDRLGGEQETQYF	expanded	0.00312515	0.010938	0.0156257	3.5	5	0.7
N51	07D075	CSAPAGGGDYNEQFF	expanded	0.00937544	0.0250012	0.0203135	2.66667	2.16667	1.23077
N51	07D075	CSARGVGDQPQYF	expanded	0.00781287	0.0250012	0.021876	3.2	2.8	1.14286
N51	07D075	CASSLGGEQFF	expanded	0.00468772	0.0890667	0.0343766	19	7.33333	2.59091
N51	07D075	CSVVGQGVEKLFF	expanded	0.00625029	0.0156257	0.0125006	2.5	2	1.25
N51	07D075	CASSDAWGEQRETQYF	expanded	0.00781287	0.0187509	0.0203135	2.4	2.6	0.923077
N51	07D075	CSVEGDENYDYTF	emerged	-	0.0312515	0.0125006	-	-	2.5
N51	07D075	CSVEEDAAYEQYF	emerged	-	0.15157	0.0468772	-	-	3.23333
N51	07D075	CASSQWQYKNTEAFF	expanded	0.00625029	0.021876	0.021876	3.5	3.5	1
N51	07D075	CASSVTGYEQYF	expanded	0.00625029	0.0250012	0.0156257	4	2.5	1.6
N51	07D075	CASSEAGEEIHEKLFF	expanded	0.0593778	0.167195	0.101567	2.81579	1.71053	1.64615
N51	07D075	CASSESGQSNQPQYF	emerged	-	0.0421895	0.0156257	-	-	2.7
N51	07D075	CASSKDSQNTQYF	expanded	0.390643	1.14224	0.957857	2.924	2.452	1.1925
N51	07D075	CSVGRSGNYDYTF	expanded	0.00468772	0.010938	0.010938	2.33333	2.33333	1
N51	07D075	CASSWTGGNYGEQFF	expanded	0.0203135	0.0515649	0.0359392	2.53846	1.76923	1.43478
N51	07D075	CASSYHTGQNYDYTF	expanded	0.0312515	0.0671906	0.0828164	2.15	2.65	0.811321
N51	07D075	CASSEYHDSNQPQYF	expanded	0.00468772	0.0140632	0.021876	3	4.66667	0.642857
N51	07D098	CASSDQAPKQNTQYF	expanded	0.00156257	0.0140632	0.0140632	9	9	1
N51	07D098	CASSDFHETKGDYTF	expanded	0.00937544	0.0187509	0.010938	2	1.16667	1.71429
N51	07D098	CSAKNRDSYYEQYF	expanded	0.00937544	0.0265637	0.0125006	2.83333	1.33333	2.125
N51	07D098	CASSQGGNQPQYF	expanded	0.00156257	0.0234386	0.010938	15	7	2.14286
N51	07D098	CASSLGQGVDYTF	expanded	0.00468772	0.0281263	0.0125006	6	2.66667	2.25
N51	07D098	CASSQEWGYQYF	expanded	0.00468772	0.0156257	0.0234386	3.33333	5	0.666667
N51	07D098	CASSPESGSILGGMAYDNEQFF	emerged	-	0.0125006	0.010938	-	-	1.14286
N51	07D098	CASSLKQGLFEQYF	expanded	0.00781287	0.0296889	0.0125006	3.8	1.6	2.375
N51	07D098	CASSRNQPQYF	expanded	0.00937544	0.0812538	0.0171883	8.66667	1.83333	4.72727
N51	07D098	CASSGSPPVDPQYF	expanded	0.00781287	0.0296889	0.0171883	3.8	2.2	1.72727
N51	07D098	CASSIWDWGELIPAQLFF	expanded	0.00781287	0.0156257	0.010938	2	1.4	1.42857
N51	07D098	CANRDLGTGADEKLFF	expanded	0.0171883	0.0375018	0.0890667	2.18182	5.18182	0.421053
N51	07D098	CASSVRQNNEQFF	expanded	0.00312515	0.0187509	0.0125006	6	4	1.5
N51	07D098	CSVRGQGETQYF	expanded	0.00312515	0.0234386	0.0125006	7.5	4	1.875
N51	07D098	CASSDSGQVNDYTF	emerged	-	0.0125006	0.010938	-	-	1.14286
N51	07D098	CASSSGTGGDREQYF	expanded	0.00468772	0.0312515	0.0187509	6.66667	4	1.66667
N51	07D098	CASSTGESGNTVYF	expanded	0.00937544	0.0265637	0.0171883	2.83333	1.83333	1.54545
N51	07D098	CASNPRNYDYTF	expanded	0.00156257	0.010938	0.010938	7	7	1
N51	07D098	CASSFDAVDRGDYGEQFF	expanded	0.00468772	0.021876	0.010938	4.66667	2.33333	2
N51	07D098	CASSTTHRGTNEQYF	expanded	0.00937544	0.0250012	0.010938	2.66667	1.16667	2.28571
N51	07D098	CASSYSNNWGDVQETQYF	expanded	0.0265637	0.0562526	0.0312515	2.11765	1.17647	1.8
N51	A2L019	CASSSSGRRIDYTF	expanded	0.00781287	0.021876	0.0312515	2.8	4	0.7
N51	A2L019	CASSYGSGQNTAQLFF	expanded	0.00156257	0.0125006	0.0140632	8	9	0.888889
N51	A2L019	CASSQDWSFSNTAQLFF	expanded	0.0796912	0.187509	0.2672	2.35294	3.35294	0.701754
N51	A2L019	CASSYDSGQNTAQLLF	expanded	0.00781287	0.0171883	0.021876	2.2	2.8	0.785714
N51	A2L019	CASSYDSGQSTAQLFF	expanded	0.00468772	0.0187509	0.0140632	4	3	1.33333
N51	A2L019	CASSRTETYEQYF	expanded	0.00156257	0.010938	0.010938	7	7	1
N51	A2L019	CASRQGRRNPQYF	expanded	0.010938	0.0296889	0.0265637	2.71429	2.42857	1.11765
N51	A2L019	CASSPRQGYYDYTF	expanded	0.789099	1.90009	2.45324	2.40792	3.10891	0.774522
N51	A2L019	CASSYDSGQNTAQLFF	expanded	2.91107	7.96756	8.76604	2.73698	3.01127	0.908913
N51	A2L019	CASRQDRRSPQYF	expanded	0.00625029	0.0140632	0.0156257	2.25	2.5	0.9
N51	A2L019	CASRRDRRNPQYF	expanded	0.00781287	0.0203135	0.010938	2.6	1.4	1.85714
N51	A2L019	RASRQDRRNPQYF	expanded	0.00312515	0.0125006	0.010938	4	3.5	1.14286
N51	A2L019	CASKPGTNTAQLFF	expanded	0.00781287	0.021876	0.0312515	2.8	4	0.7
N51	A2L019	CASSERGETETNTAQLFF	expanded	1.80633	3.63455	4.79397	2.01211	2.65398	0.758149
N51	A2L019	CASTELDRGDNEQFF	expanded	1.92665	3.96112	5.63151	2.05596	2.92295	0.703385
N51	A2L019	CASSYDSGQNTAQLFL	expanded	0.00312515	0.0156257	0.0125006	5	4	1.25
N51	A2L019	CASSDRPTAQLFF	expanded	0.207822	0.531275	0.562526	2.55639	2.70677	0.944444
N51	A2L019	CASSKQQGNEQFF	expanded	0.298451	0.714096	1.19537	2.39267	4.00524	0.597386
N51	A2L019	CASRTQGIDYDYTF	expanded	0.00781287	0.0265637	0.0171883	3.4	2.2	1.54545
N51	A2L019	CASSSGTVYEQYF	emerged	-	0.0125006	0.0156257	-	-	0.8
N51	A2L019	CASSAPSSTDPQYF	expanded	0.00781287	0.0156257	0.010938	2	1.4	1.42857
N51	A2L019	CASSPSMTPNTEAFF	expanded	0.00312515	0.0234386	0.0234386	7.5	7.5	1
N51	A2L019	CASSLVGGAGNTVYF	expanded	0.00625029	0.0156257	0.010938	2.5	1.75	1.42857
N51	A2L019	CASSLAQGSGASVLTF	expanded	1.96884	4.89085	5.69089	2.48413	2.89048	0.859418
N51	A2L019	CASSEEGIRSHEQFF	expanded	0.00468772	0.010938	0.0125006	2.33333	2.66667	0.875
N51	A2L019	CASSQDLDFITDPQYF	expanded	0.00156257	0.010938	0.0125006	7	8	0.875
N51	A2L019	CAGGTLYEQYF	expanded	0.00937544	0.0265637	0.0203135	2.83333	2.16667	1.30769
N51	A2L019	CASSEGQNTEAFF	expanded	0.0187509	0.0703158	0.0546901	3.75	2.91667	1.28571
N51	A2L019	CASSYDSGQNAAQLFF	emerged	-	0.0125006	0.010938	-	-	1.14286
N51	A5R069	CASSFIPMLYSNQPQYF	expanded	0.00312515	0.0578152	0.0312515	18.5	10	1.85
N51	A5R069	CASSATGGEGTEQYF	expanded	0.00312515	0.010938	0.0125006	3.5	4	0.875
N51	A5R069	CASISRPSRDCHWVF	expanded	0.00937544	0.0359392	0.0140632	3.83333	1.5	2.55556
N51	A5R069	CASRDGTVNQPQYF	expanded	0.00625029	0.0140632	0.010938	2.25	1.75	1.28571
N51	A5R069	CASSPGQLMKKLFF	expanded	0.0796912	0.190634	0.200009	2.39216	2.5098	0.953125
N51	A5R069	CSARTGGSLDTQYF	expanded	0.0296889	0.0968795	0.125006	3.26316	4.21053	0.775
N51	A5R069	CASSLGQGIHEQYF	expanded	0.00468772	0.010938	0.010938	2.33333	2.33333	1
N51	A5R069	CASKGKGAPNYDYTF	expanded	0.47971	0.990671	0.971921	2.06515	2.02606	1.01929
N51	A5R069	CASSERAGTYNSPLHF	expanded	0.248449	0.567214	0.723471	2.28302	2.91195	0.784017
N51	A5R069	CASSKRGGDYTF	expanded	0.00625029	0.0281263	0.0468772	4.5	7.5	0.6
N51	A5R069	CASSSGQGGEQFF	expanded	0.00625029	0.0156257	0.010938	2.5	1.75	1.42857
N51	A5R069	CASSESSQGGTEAFF	expanded	0.00312515	0.021876	0.0187509	7	6	1.16667
N51	A5R069	CASSPATTNEKLFF	expanded	0.010938	0.0250012	0.021876	2.28571	2	1.14286
N51	A5R069	CASSSHYGEQFF	emerged	-	0.0125006	0.0140632	-	-	0.888889
N51	A5R069	CASSEAGGSPLHF	expanded	0.00312515	0.010938	0.0203135	3.5	6.5	0.538462
N51	A5R069	CASSRQGGDYTF	expanded	0.010938	0.0250012	0.0296889	2.28571	2.71429	0.842105
N51	A5R069	CASSKQGGDCTF	expanded	0.00468772	0.0203135	0.0234386	4.33333	5	0.866667
N51	A5R069	CSGGTGRFYEQYF	expanded	0.00781287	0.0765661	0.0531275	9.8	6.8	1.44118
N51	A5R069	CASSQDREIAQLFF	expanded	0.00781287	0.0203135	0.0250012	2.6	3.2	0.8125
N51	A5R069	CSADQDRGALLGEKLFF	expanded	0.15157	0.600028	0.439083	3.95876	2.89691	1.36655
N51	A5R069	CASSPELSTAQLFF	expanded	0.00312515	0.0140632	0.0203135	4.5	6.5	0.692308
N51	A5R069	CSASLTNEKLFF	expanded	0.00781287	0.0156257	0.0125006	2	1.6	1.25
N51	A5R069	CASSEALENTVYF	expanded	0.00312515	0.0187509	0.0156257	6	5	1.2
N51	A5R069	CATSARDSYNEKLFF	expanded	0.0265637	0.0828164	0.0609404	3.11765	2.29412	1.35897
N51	A5R069	CASSSLTDDAYEQYF	emerged	-	0.0171883	0.010938	-	-	1.57143
N51	A5R069	CASTRPPDPQYF	expanded	0.0125006	0.0265637	0.0203135	2.125	1.625	1.30769
N51	A5R069	CASSYMDRASQNTQYF	expanded	0.304702	0.709408	0.593778	2.32821	1.94872	1.19474
N51	A5R069	CASSADWVSTAQLFF	emerged	-	0.0125006	0.010938	-	-	1.14286
N51	A5R069	CASLSSQGYSPLHF	expanded	0.00937544	0.0187509	0.0265637	2	2.83333	0.705882
N51	A5R069	CSAARTGNTYEQYF	expanded	0.00625029	0.0140632	0.0125006	2.25	2	1.125
N51	A5R069	CASSKQGGGYTF	expanded	0.00937544	0.032814	0.0421895	3.5	4.5	0.777778
N51	A5R069	CASSEFLASYDYTF	expanded	0.410957	1.03442	0.954732	2.51711	2.32319	1.08347
N51	A5R069	CASSQAPGQLNSPLHF	expanded	0.0171883	0.289076	0.100005	16.8182	5.81818	2.89062
N51	A5R069	CASSESLGETYGEQFF	expanded	0.0921918	0.184384	0.357829	2	3.88136	0.515284
N51	A5R069	CASSEGPGQGNSPLHF	expanded	0.0343766	0.143757	0.110943	4.18182	3.22727	1.29577
N51	A5R069	CASSQGQGNTVYF	expanded	0.00781287	0.0234386	0.0296889	3	3.8	0.789474
N51	A5R069	CSVLTGEGSPLHF	expanded	0.0859415	0.246887	0.123443	2.87273	1.43636	2
N51	A5R069	CASSDSGEVAQLFF	expanded	0.00937544	0.021876	0.0171883	2.33333	1.83333	1.27273
N51	A5R069	CATSSRDGYNEKLFF	expanded	0.0203135	0.0484398	0.0281263	2.38462	1.38462	1.72222
N51	A5R069	CGSSKQGGDYTF	expanded	0.00312515	0.0125006	0.010938	4	3.5	1.14286
N51	A5R069	CASSEAGRGSTDPQYF	expanded	0.0500023	0.117193	0.0984421	2.34375	1.96875	1.19048
N51	A5R069	CASSDWGTDPQYF	expanded	0.00312515	0.0140632	0.0125006	4.5	4	1.125
N51	A5R069	CASARQGGDYTF	expanded	0.0515649	0.10313	0.10938	2	2.12121	0.942857
N51	A5R069	CASSKQGGDYTF	expanded	8.86135	19.34	24.0246	2.18251	2.71116	0.805008
N51	A5R069	CASSLGRGVADPQYF	expanded	0.00937544	0.0312515	0.0265637	3.33333	2.83333	1.17647
